# Supplementary material for: Selective aqueous anion recognition in an anionic host
Source: PubMed Central journal article supplement — iScience. 2024 Nov 8;27(12):111348. doi: 10.1016/j.isci.2024.111348 (PMC11617965; doi:10.1016/j.isci.2024.111348), 2024-11-08
Supplement: mmc1.pdf [file mmc1.pdf]

iScience, Volume ■ ■

## **Supplemental information**

### **Selective aqueous anion recognition**

#### **in an anionic host**

**Noa Bar Ziv, Chengwei Chen, Bryce da Camara, Ryan R. Julian, and Richard J. Hooley**

## Supplemental Information

## Supplemental Figures

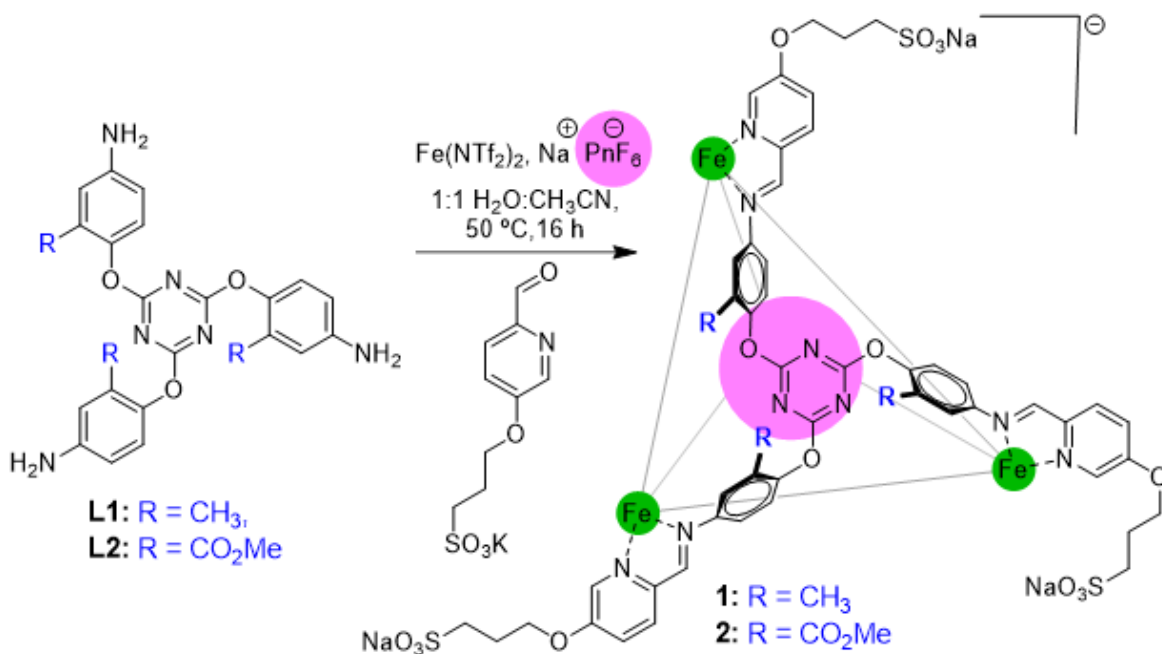

**Figure S-1.** Reaction scheme of self-assembled cages **1** and **2**. Related to Figure 1.

## Cage Characterization

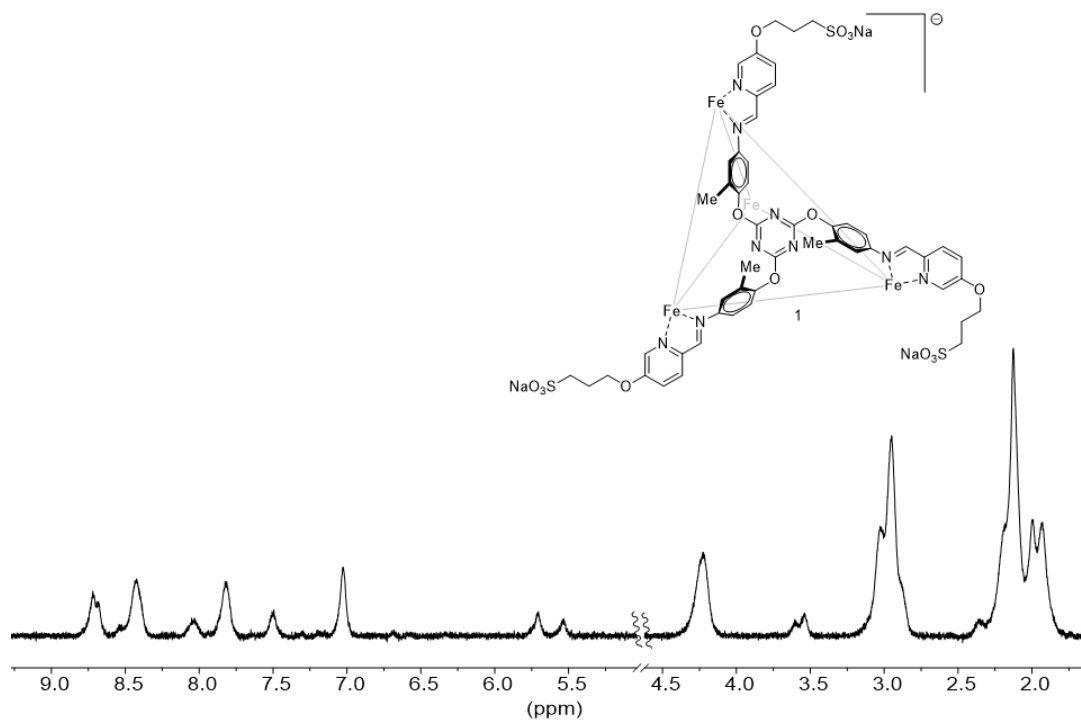

**Figure S-2.**  $^1\text{H}$  NMR spectrum of cage **1** ( $\text{D}_2\text{O}$ , 400 MHz, 298K). Related to Figure 1 and STAR methods, synthesis of cage **1**.

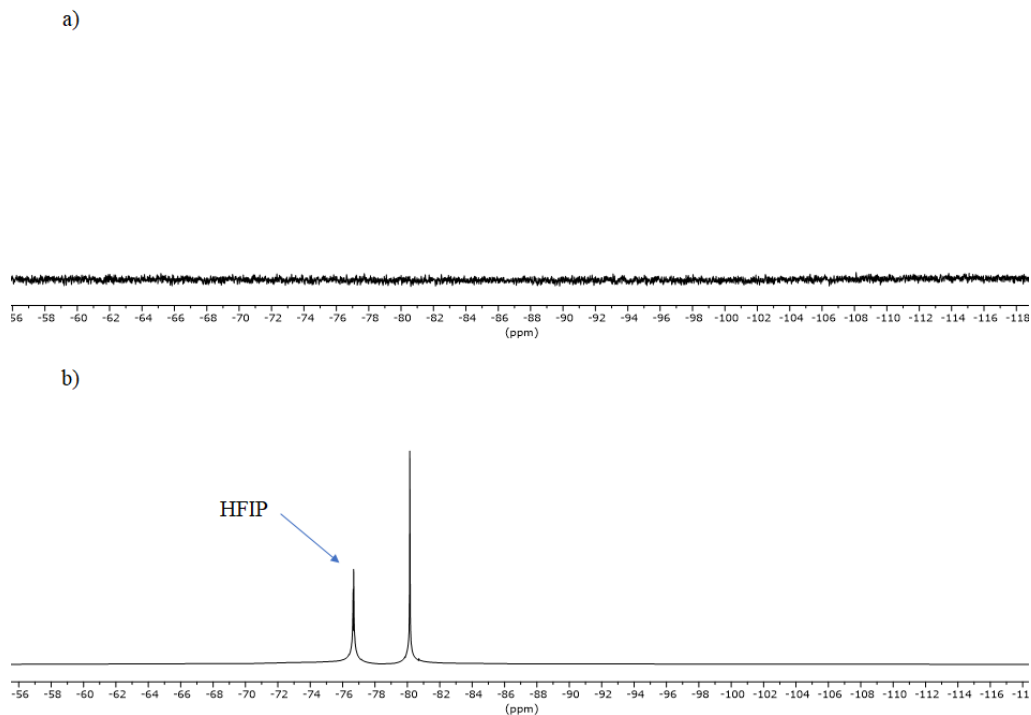

**Figure S-3.**  $^{19}\text{F}$  NMR spectrum of a) cage **1** and b)  $\text{NaNTf}_2$  with hexafluoroisopropanol (HFIP) as a standard ( $\text{D}_2\text{O}$ , 376 MHz, 298K). Related to Figure 1 and STAR methods, synthesis of cage **1**.

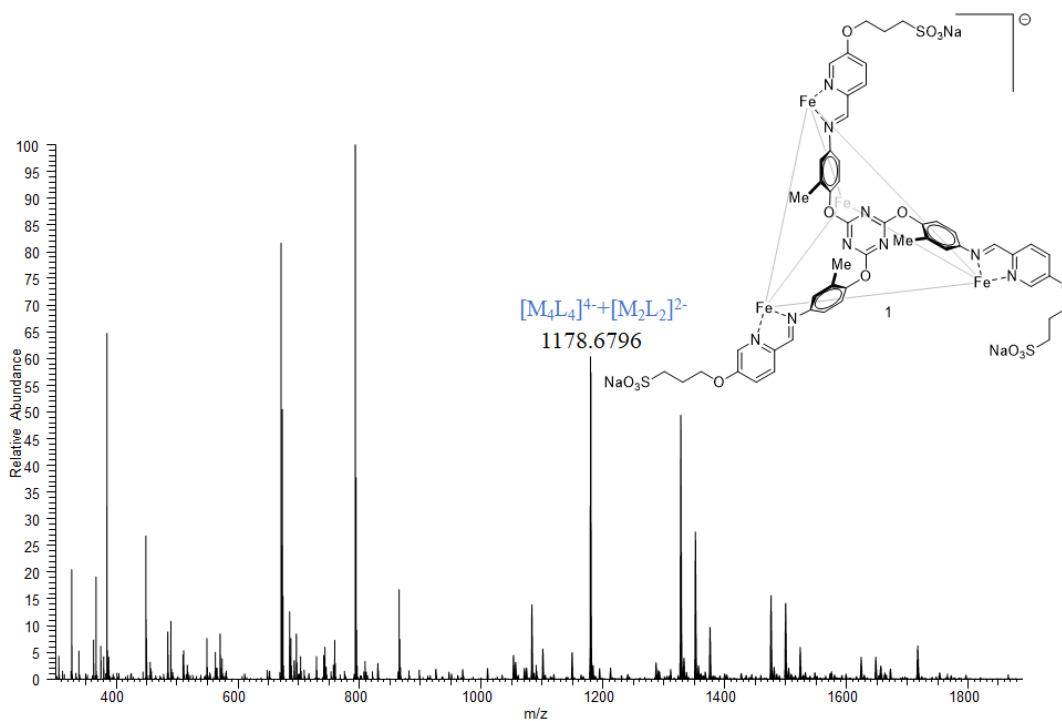

**Figure S-4.** ESI-MS spectrum of cage **1**. The flow rate, sheath gas flow rate, aux gas flow rate, spray voltage, capillary temperature, and the S-lens RF level were set to be 3  $\mu\text{l}/\text{min}$ , 5 arb, 10 arb, 2.8 kV, 215 C, and 40% respectively. Full mass spectra were acquired with a resolution of  $r = 30,000$ . Related to Figure 1 and STAR methods, ESI-MS spectrum of cage **1**.

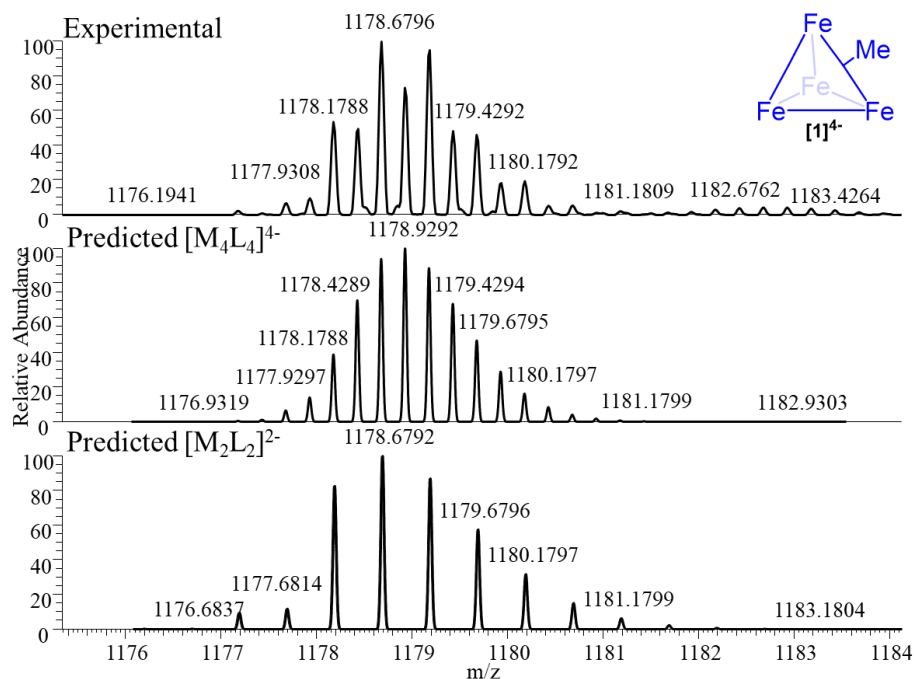

**Figure S-5.** Expansion of the ESI-MS spectrum of **1**, showing obtained and simulated isotope region  $[1]^{4-}$  +  $[Fe_2L_2]^{2-}$ . Related to Figure 1 and STAR methods, ESI-MS spectrum of cage **1**.

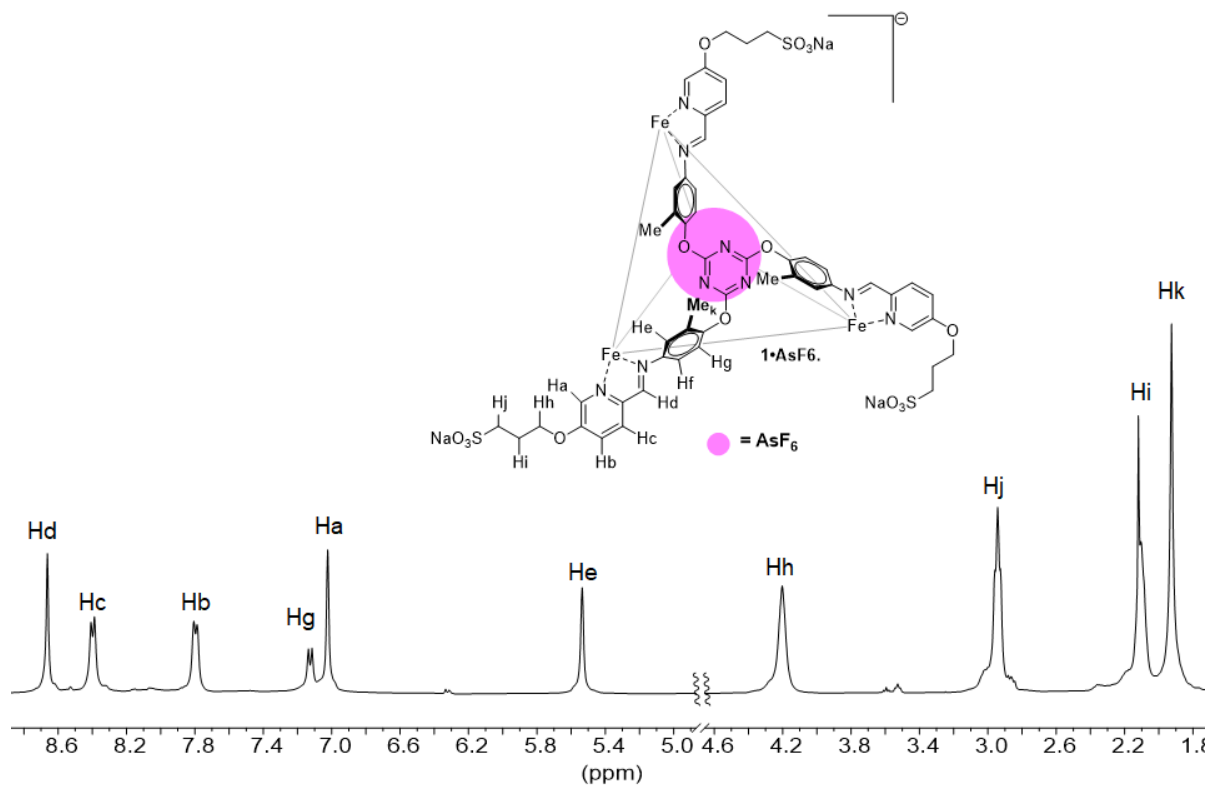

**Figure S-6.**  $^1\text{H}$  NMR spectrum of cage **1**• $\text{AsF}_6$ . The peak for  $\text{H}_f$  is under the HDO peak ( $\text{D}_2\text{O}$ , 400 MHz, 298K). Related to Figure 2 and STAR methods, synthesis of cage **1**• $\text{AsF}_6$ .

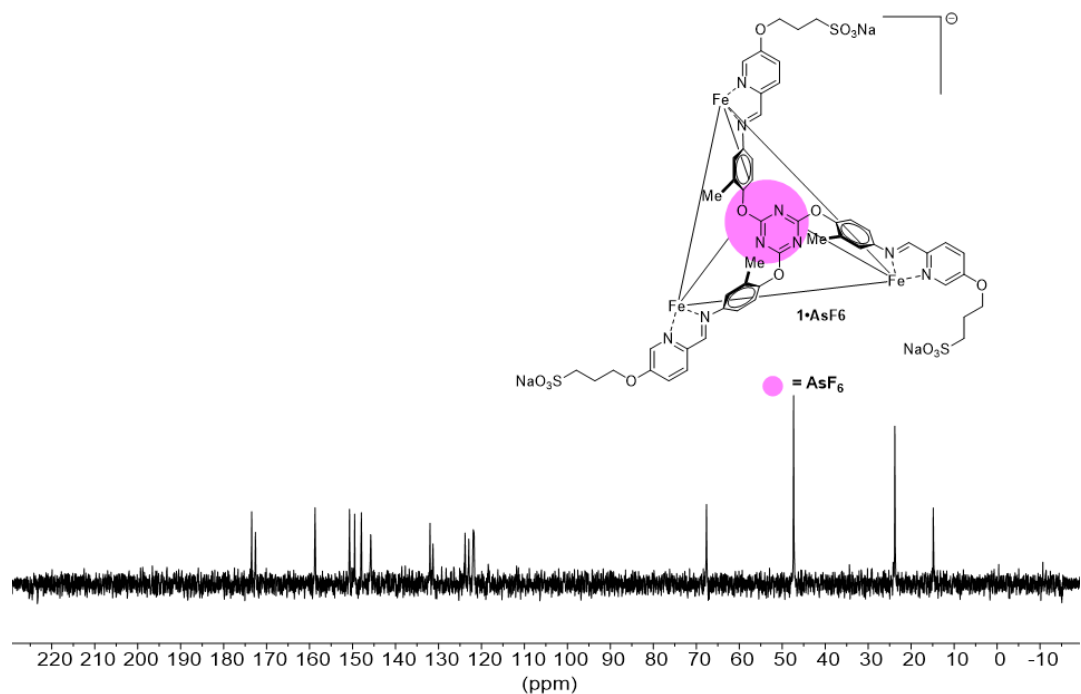

**Figure S-7.**  $^{13}\text{C}\{^1\text{H}\}$  NMR spectrum of cage  $1\cdot\text{AsF}_6$  ( $\text{D}_2\text{O}$ , 101 MHz, 298K). Related to Figure 2 and STAR methods, synthesis of cage  $1\cdot\text{AsF}_6$ .

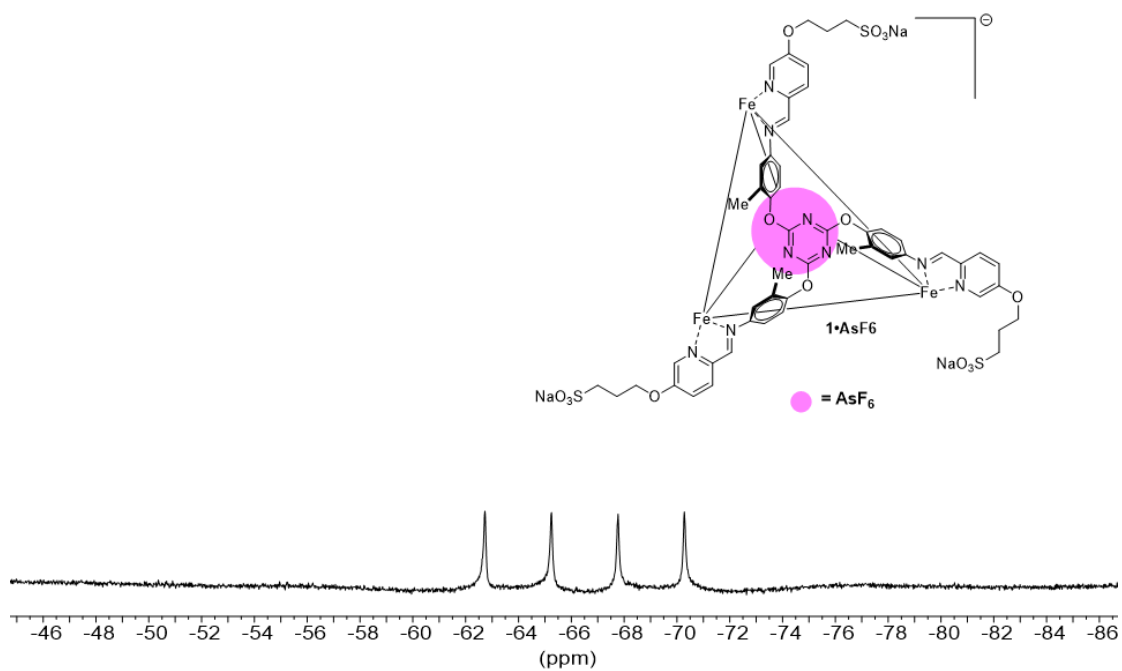

**Figure S-8.**  $^{19}\text{F}$  NMR spectrum of cage  $1\cdot\text{AsF}_6$  ( $\text{D}_2\text{O}$ , 376 MHz, 298K). Related to Figure 2 and STAR methods, synthesis of cage  $1\cdot\text{AsF}_6$ .

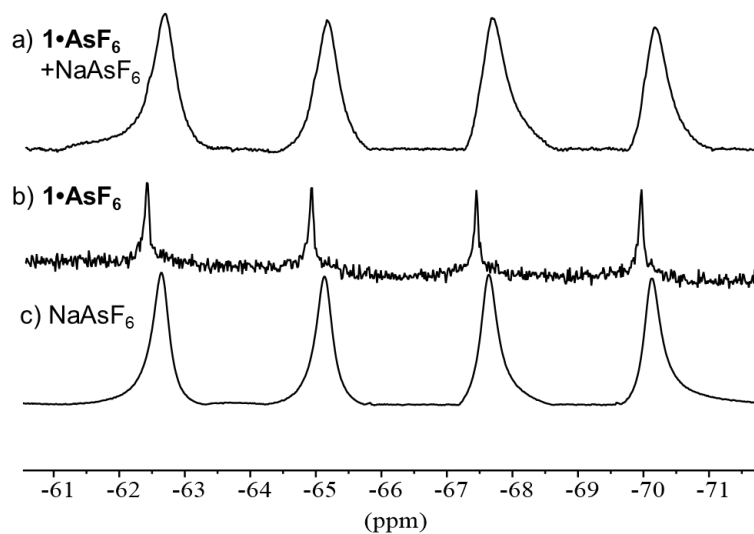

**Figure S-9.**  $^{19}\text{F}$  NMR spectrum of a)  $1\cdot\text{AsF}_6$  with added  $\text{NaAsF}_6$ ; b)  $1\cdot\text{AsF}_6$ ; and c)  $\text{NaAsF}_6$  ( $\text{D}_2\text{O}$ , 376 MHz, 298K). Related to Figure 2 and STAR methods, synthesis of cage  $1\cdot\text{AsF}_6$ .

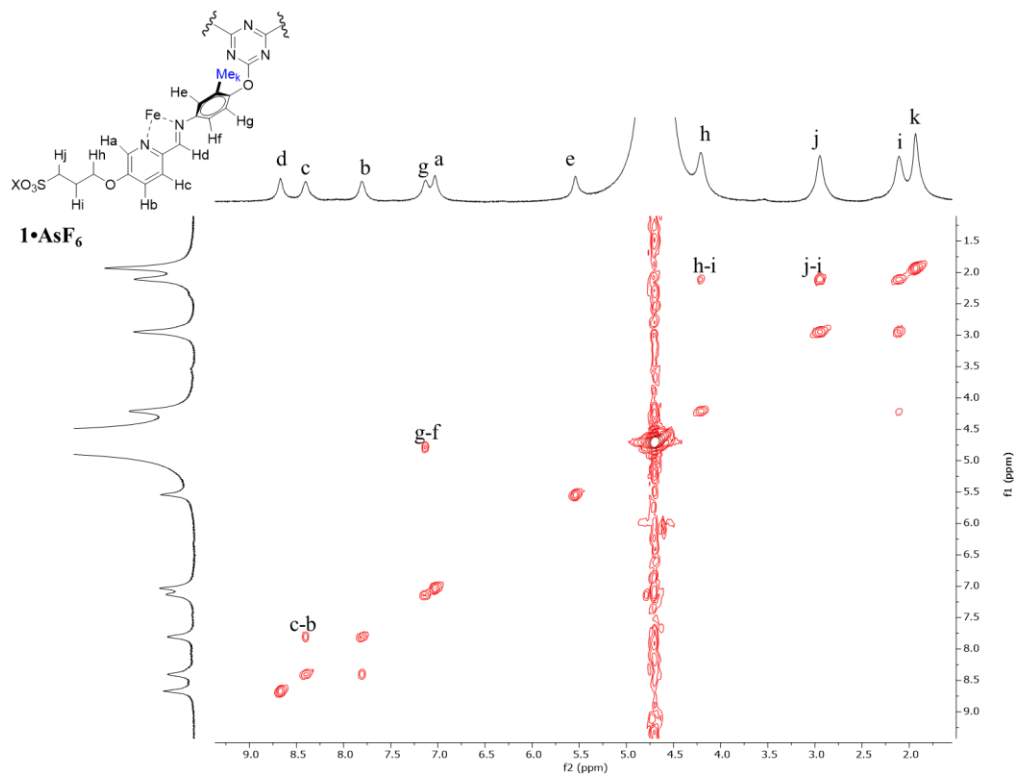

**Figure S-10.** gCOSY NMR spectrum of cage  $1\cdot\text{AsF}_6$ . The peak for  $\text{H}_i$  is under the HDO peak ( $\text{D}_2\text{O}$ , 400 MHz, 298K). Related to Figure 2 and STAR methods, synthesis of cage  $1\cdot\text{AsF}_6$ .

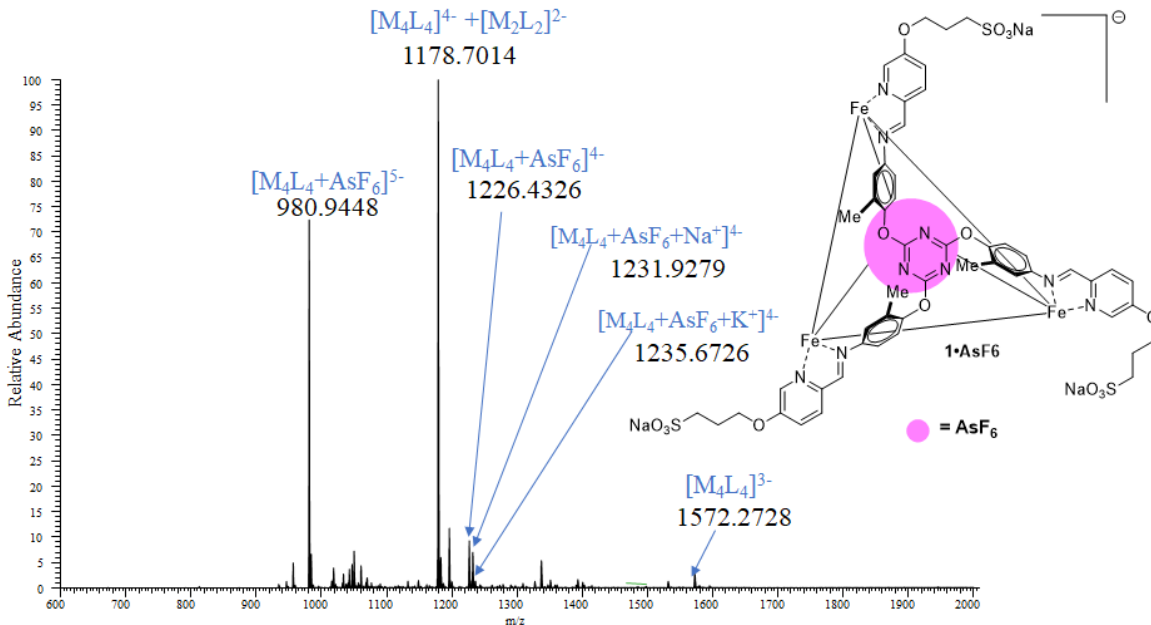

**Figure S-11.** ESI-MS spectrum of cage **1•AsF<sub>6</sub>**. The flow rate, sheath gas flow rate, aux gas flow rate, spray voltage, capillary temperature, and the S-lens RF level were set to be 5 ul/min, 10 arb, 12 arb, 2.8 kV, 200 C, and 40% respectively. Full mass spectra were acquired with a resolution of  $r = 60,000$ . Related to Figure 2 and STAR methods, ESI-MS spectrum of cage **1•AsF<sub>6</sub>**.

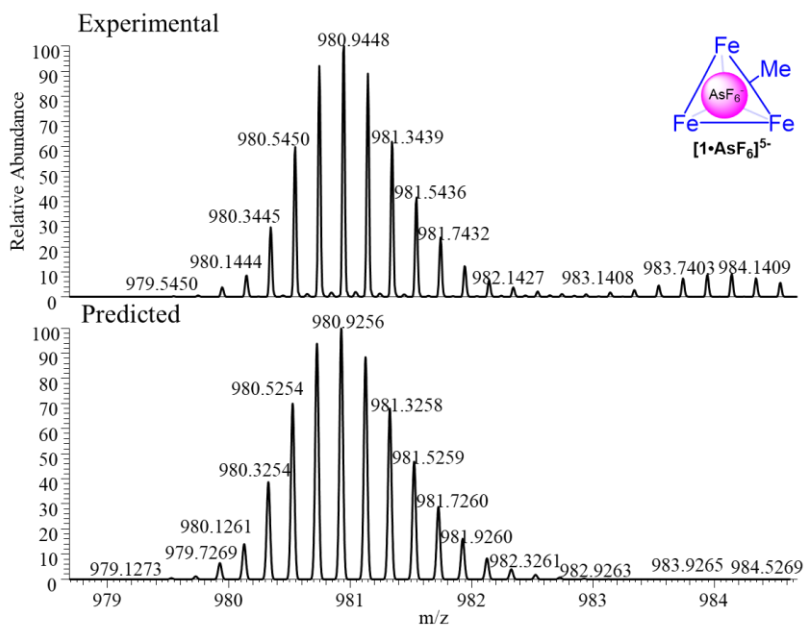

**Figure S-12.** Expansion of the ESI-MS spectrum of **1•AsF<sub>6</sub>**, showing obtained and simulated isotope region **[1•AsF<sub>6</sub>]<sup>5-</sup>**. Related to Figure 2 and STAR methods, ESI-MS spectrum of cage **1•AsF<sub>6</sub>**.



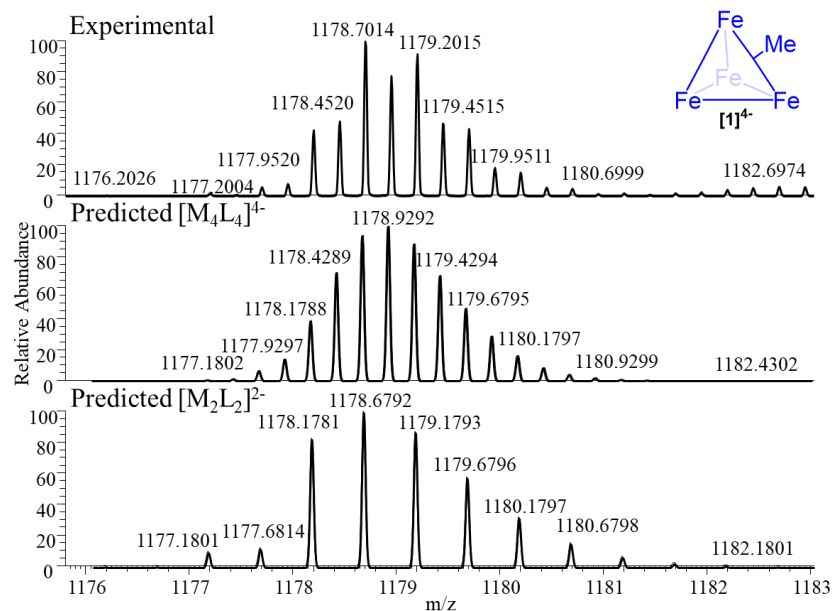

**Figure S-13.** Expansion of the ESI-MS spectrum of **1•AsF<sub>6</sub>**, showing obtained and simulated isotope region  $[1]^{4+} + [Fe_2L_2]^{2-}$ . Related to Figure 2 and STAR methods, ESI-MS spectrum of cage **1•AsF<sub>6</sub>**.

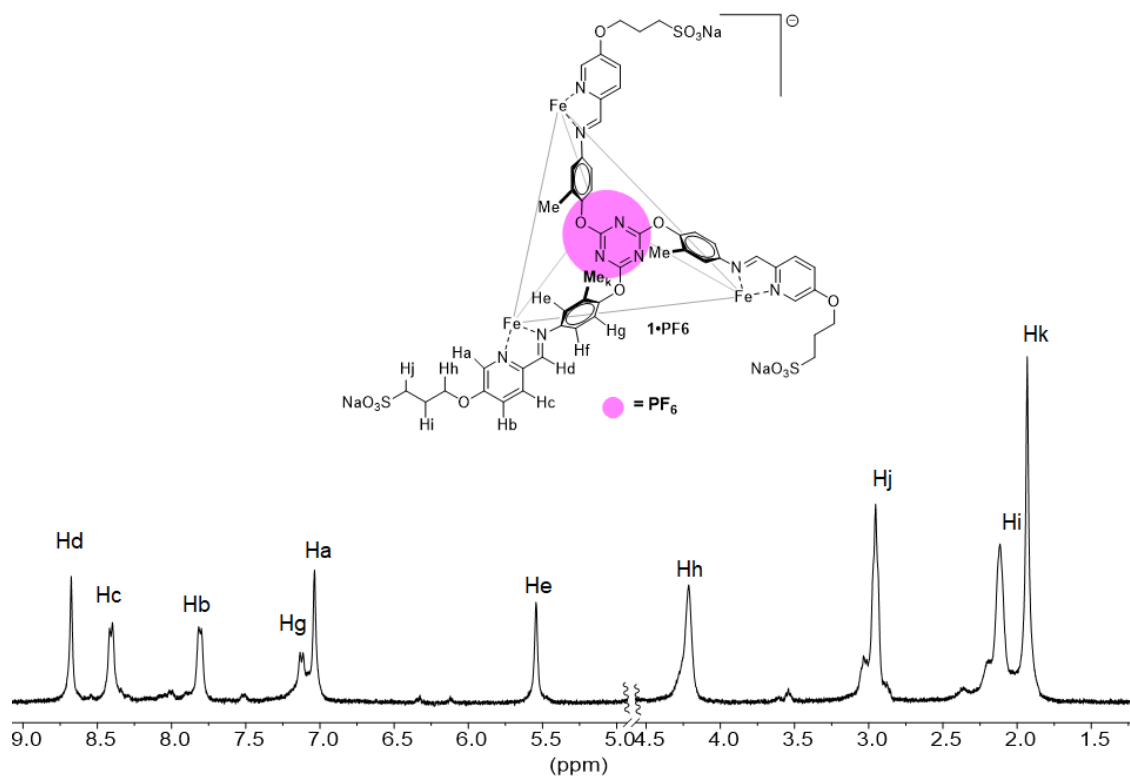

**Figure S-14.** <sup>1</sup>H NMR spectrum of cage **1•PF<sub>6</sub>**. The peak for H<sub>f</sub> is under the HDO peak (D<sub>2</sub>O, 400 MHz, 298K). Related to Figure 1 and STAR methods, synthesis of cage **1•PF<sub>6</sub>**.

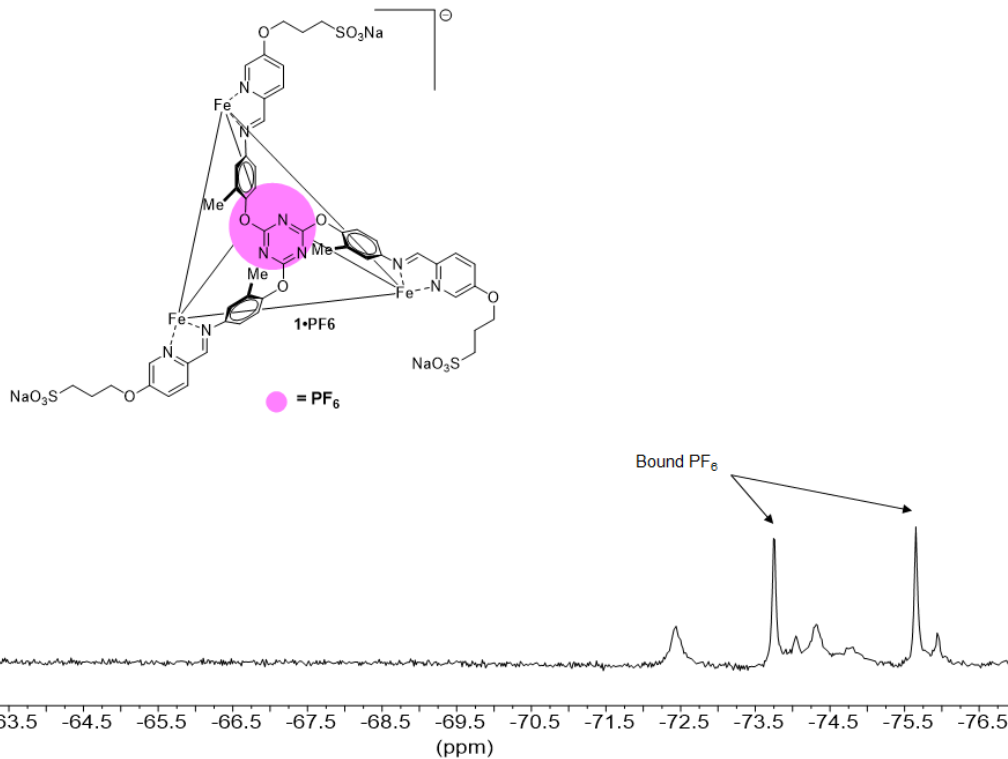

**Figure S-15.**  $^{19}\text{F}$  NMR spectrum of cage  $1 \cdot \text{PF}_6$  ( $\text{D}_2\text{O}$ , 376 MHz, 298K). Related to Figure 1 and STAR methods, synthesis of cage  $1 \cdot \text{PF}_6$ .

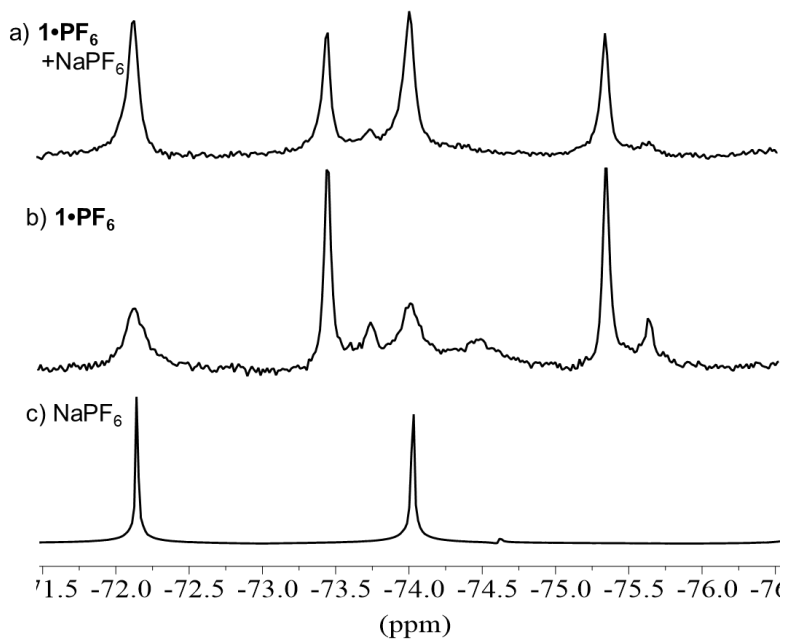

**Figure S-16.**  $^{19}\text{F}$  NMR spectrum of a)  $1 \cdot \text{PF}_6$  with added  $\text{NaPF}_6$ ; b)  $1 \cdot \text{PF}_6$ ; and c)  $\text{NaPF}_6$  ( $\text{D}_2\text{O}$ , 376 MHz, 298K). Related to Figure 3 and STAR methods, synthesis of cage  $1 \cdot \text{PF}_6$ .

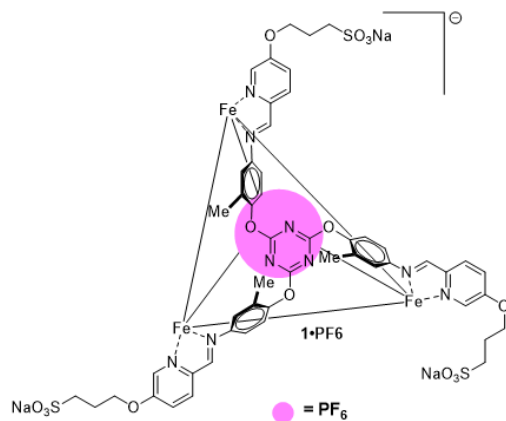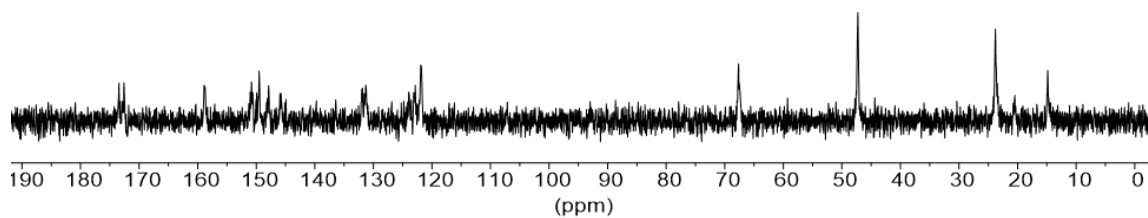

**Figure S-17.** <sup>13</sup>C{<sup>1</sup>H} NMR spectrum of cage **1**•PF<sub>6</sub> (D<sub>2</sub>O, 101 MHz, 298K). The low solubility of the complex precluded a high signal to noise ratio in any reasonable amount of time. Related to Figure 1 and STAR methods, synthesis of cage **1**•PF<sub>6</sub>.

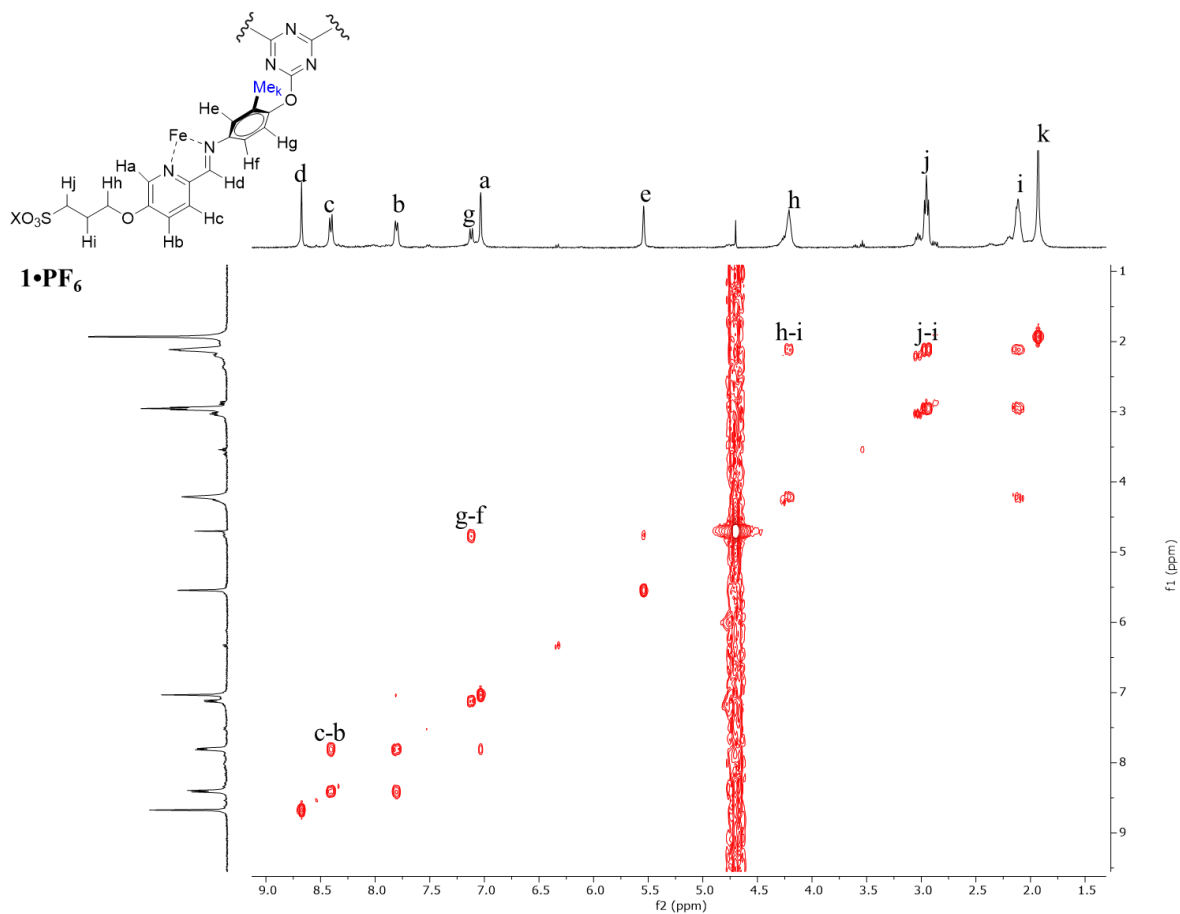

**Figure S-18.** gCOSY NMR spectrum of cage **1**•PF<sub>6</sub>. The peak for H<sub>f</sub> is under the HDO peak (D<sub>2</sub>O, 400 MHz, 298K). Related to Figure 1 and STAR methods, synthesis of cage **1**•PF<sub>6</sub>.

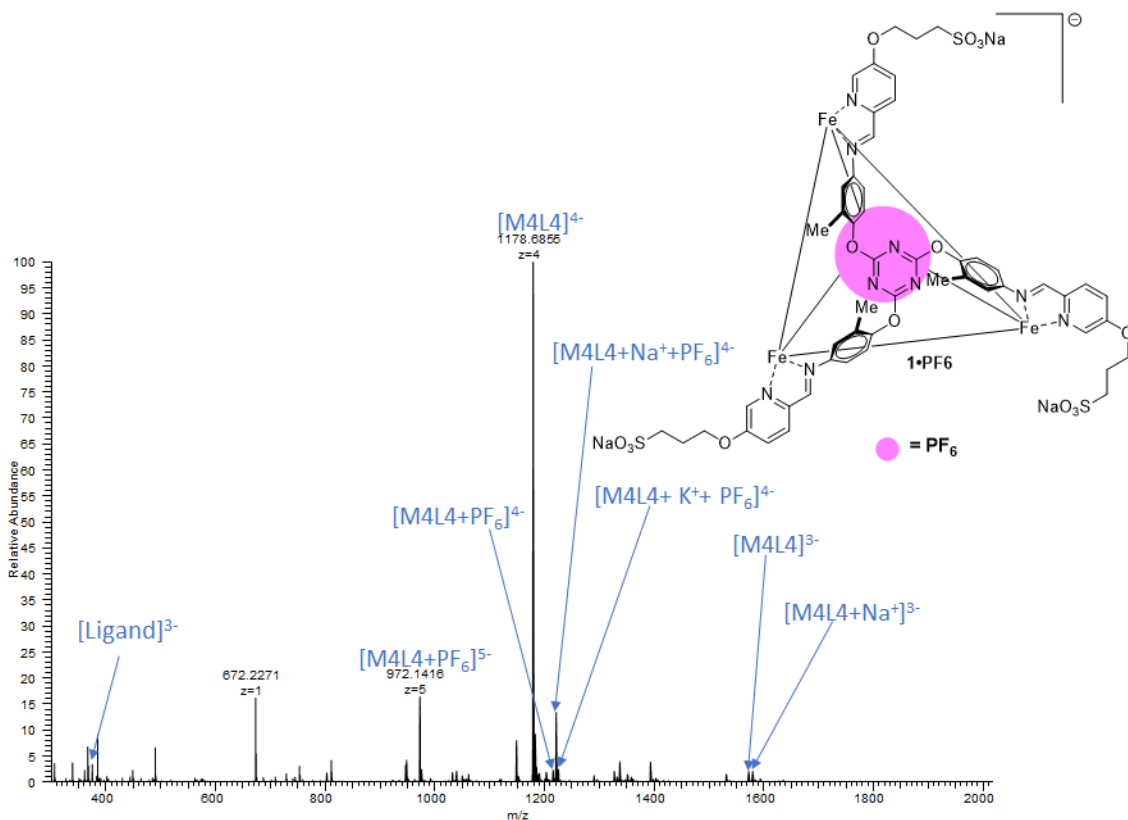

**Figure S-19.** ESI-MS spectrum of cage **1•PF<sub>6</sub>**. The flow rate, sheath gas flow rate, aux gas flow rate, spray voltage, capillary temperature, and the S-lens RF level were set to be 3  $\mu$ l/min, 5 arb, 10 arb, 3.5 kV, 200 C, and 40% respectively. Full mass spectra were acquired with a resolution of  $r = 30,000$ . Related to Figure 1 and STAR methods, ESI-MS spectrum of cage **1•PF<sub>6</sub>**.

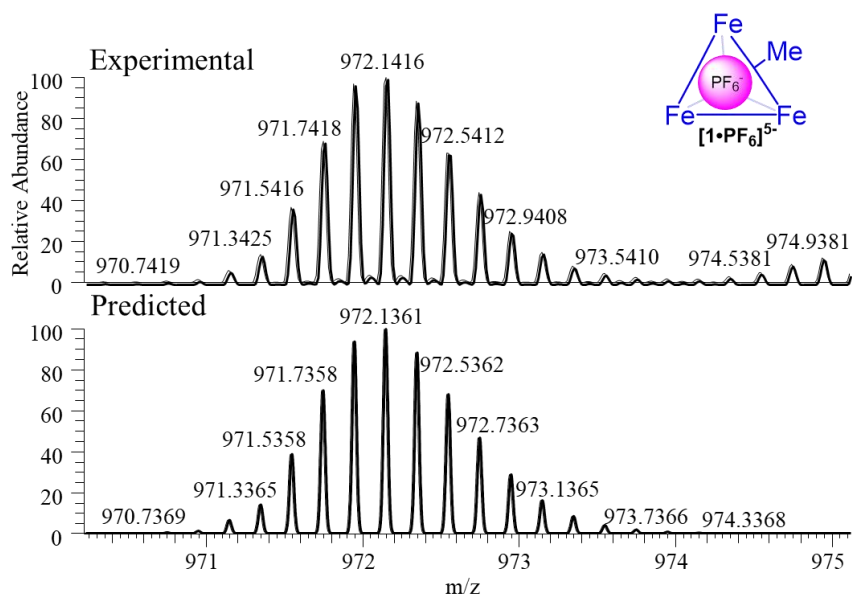

**Figure S-20.** Expansion of the ESI-MS spectrum of **1•PF<sub>6</sub>**, showing obtained and simulated isotope region  $[1\cdot\text{PF}_6]^{5-}$ . Related to Figure 1 and STAR methods, ESI-MS spectrum of cage **1•PF<sub>6</sub>**.

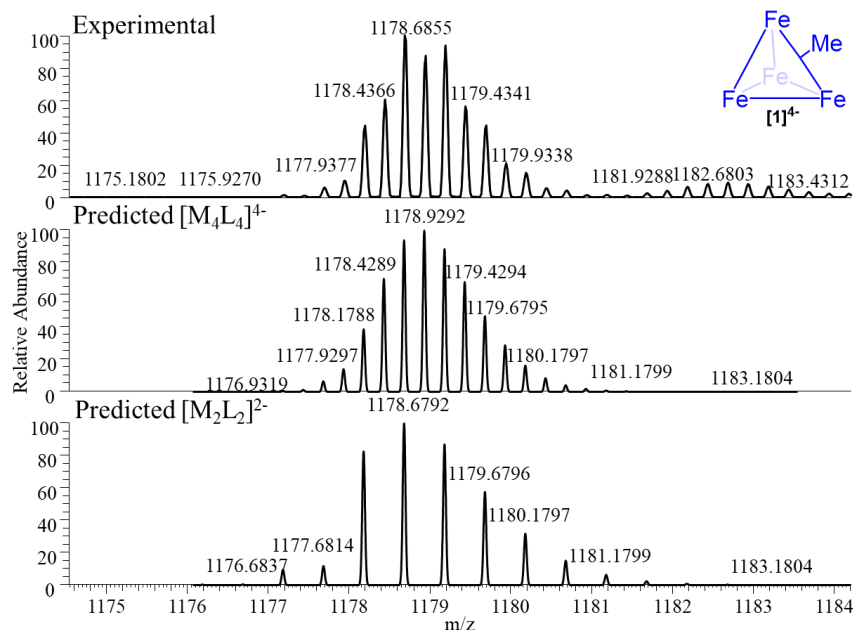

**Figure S-21.** Expansion of the ESI-MS spectrum of **1•PF<sub>6</sub>**, showing obtained and simulated isotope region  $[1]^{4+} + [Fe_2L_2]^{2-}$ . Related to Figure 1 and STAR methods, ESI-MS spectrum of cage **1•PF<sub>6</sub>**.

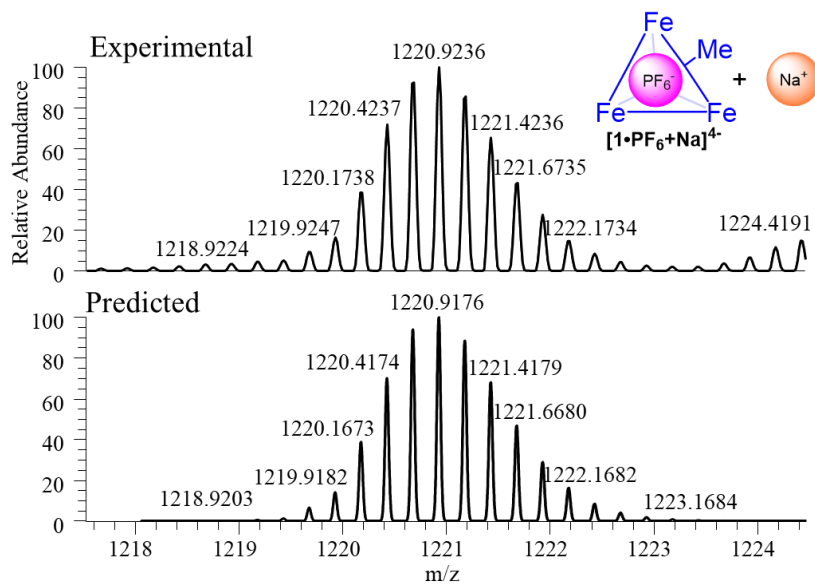

**Figure S-22.** Expansion of the ESI-MS spectrum of **1•PF<sub>6</sub>**, showing obtained and simulated isotope region  $[1\bullet PF_6 + Na^+]^{4+}$ . Related to Figure 1 and STAR methods, ESI-MS spectrum of cage **1•PF<sub>6</sub>**.

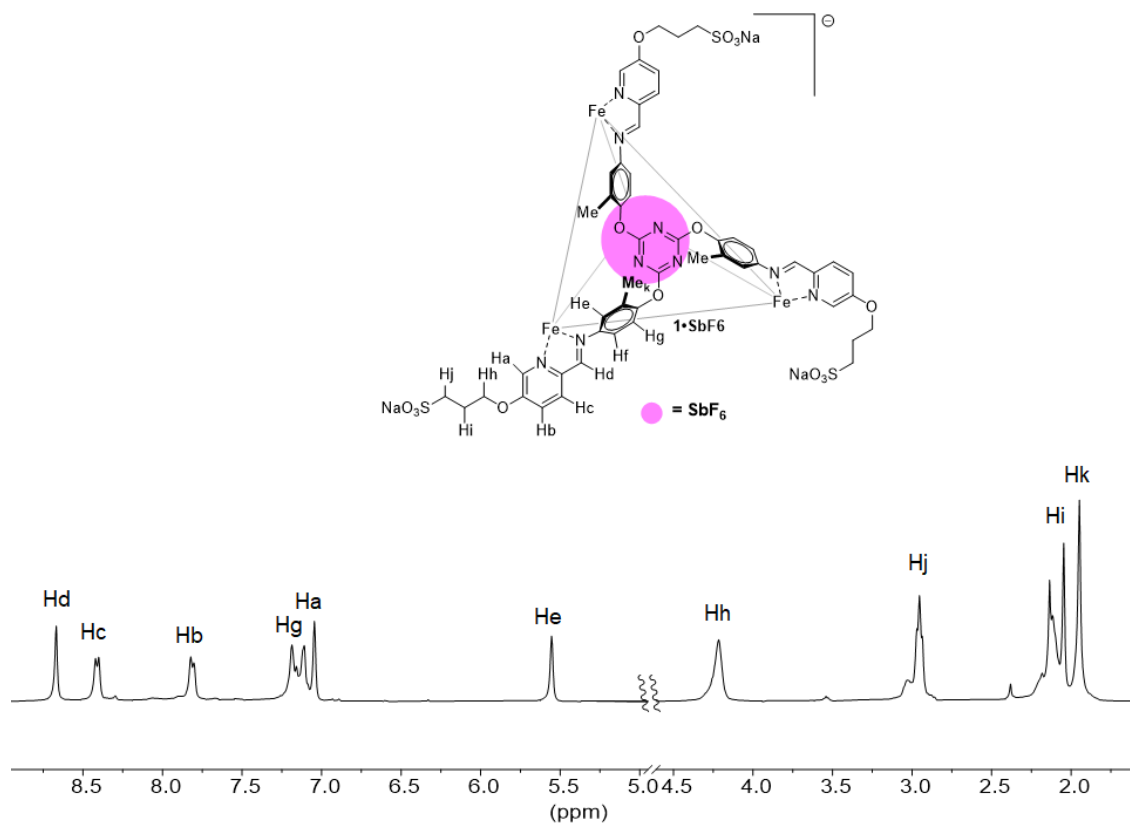

**Figure S-23.** <sup>1</sup>H NMR spectrum of cage **1**•SbF<sub>6</sub>. The peak for H<sub>f</sub> is under the HDO peak (D<sub>2</sub>O, 400 MHz, 298K). Related to Figure 1 and STAR methods, synthesis of cage **1**•SbF<sub>6</sub>.

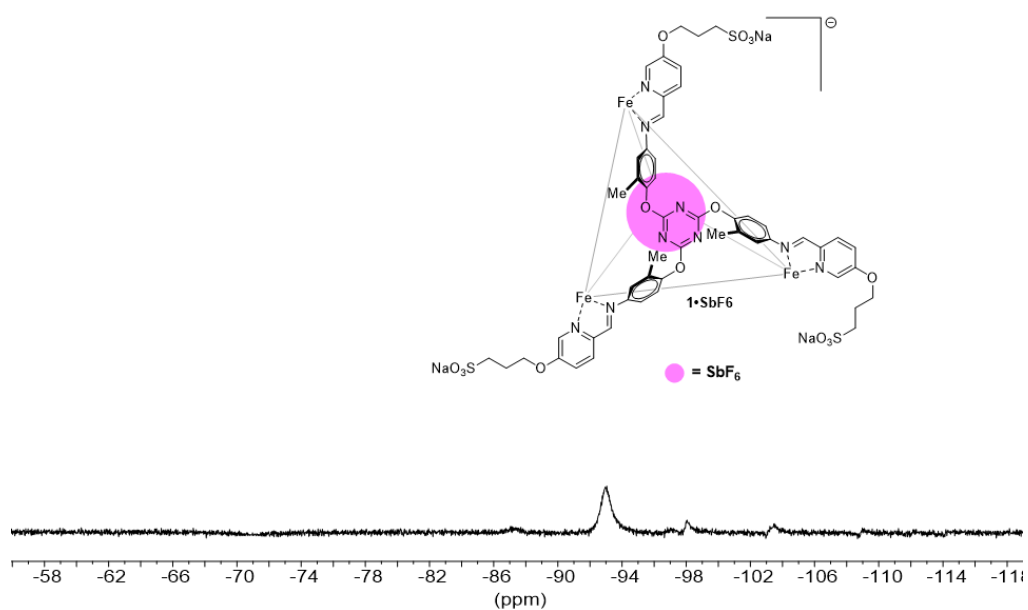

**Figure S-24.** <sup>19</sup>F NMR spectrum of cage **1**•SbF<sub>6</sub> (D<sub>2</sub>O, 376 MHz, 298K). Related to Figure 1 and STAR methods, synthesis of cage **1**•SbF<sub>6</sub>.

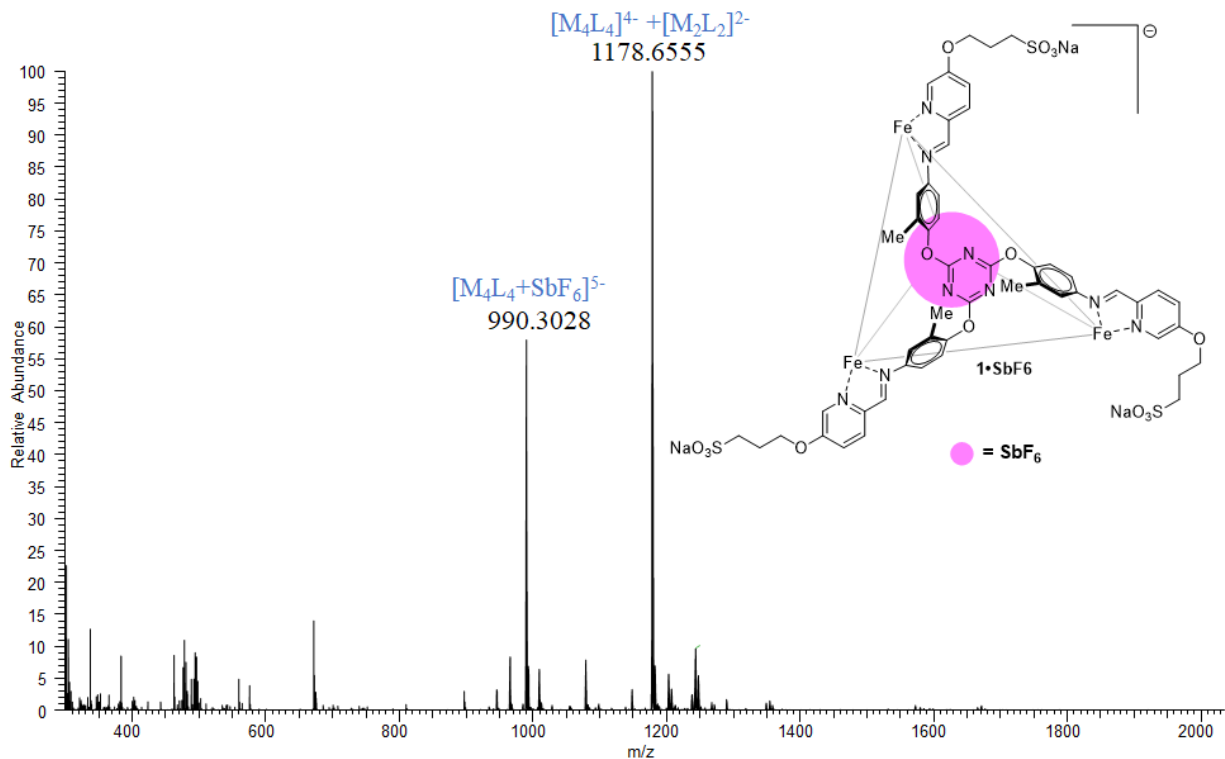

**Figure S-25.** ESI-MS spectrum of cage **1•SbF<sub>6</sub>**. The flow rate, sheath gas flow rate, aux gas flow rate, spray voltage, capillary temperature, and the S-lens RF level were set to be 5 ul/min, 5 arb, 10 arb, 4 kV, 200 C, and 20% respectively. Full mass spectra were acquired with a resolution of  $r = 15,000$ . Related to Figure 1 and STAR methods, ESI-MS spectrum of cage **1•SbF<sub>6</sub>**.

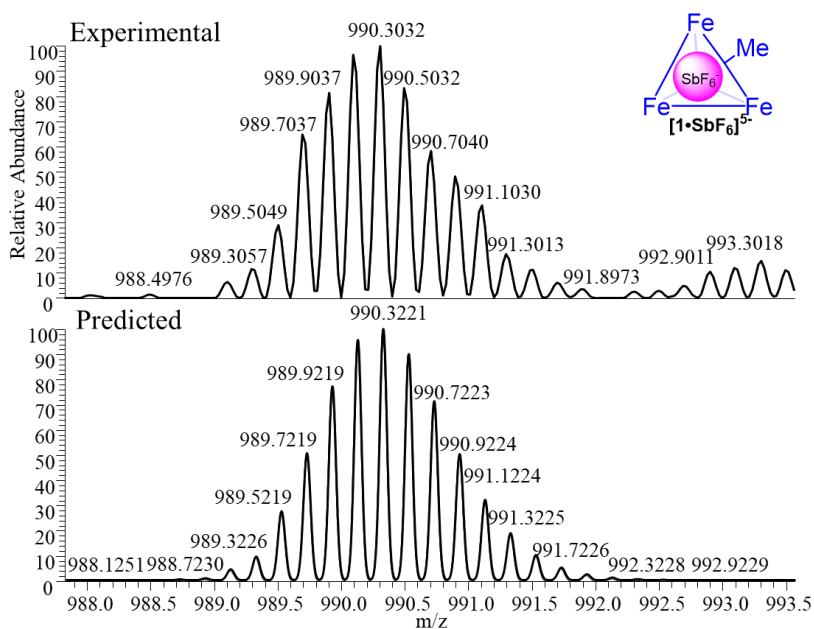

**Figure S-26.** Expansion of the ESI-MS spectrum of **1•SbF<sub>6</sub>**, showing obtained and simulated isotope region  $[1\cdot\text{SbF}_6]^{5-}$ . Related to Figure 1 and STAR methods, ESI-MS spectrum of cage **1•SbF<sub>6</sub>**.



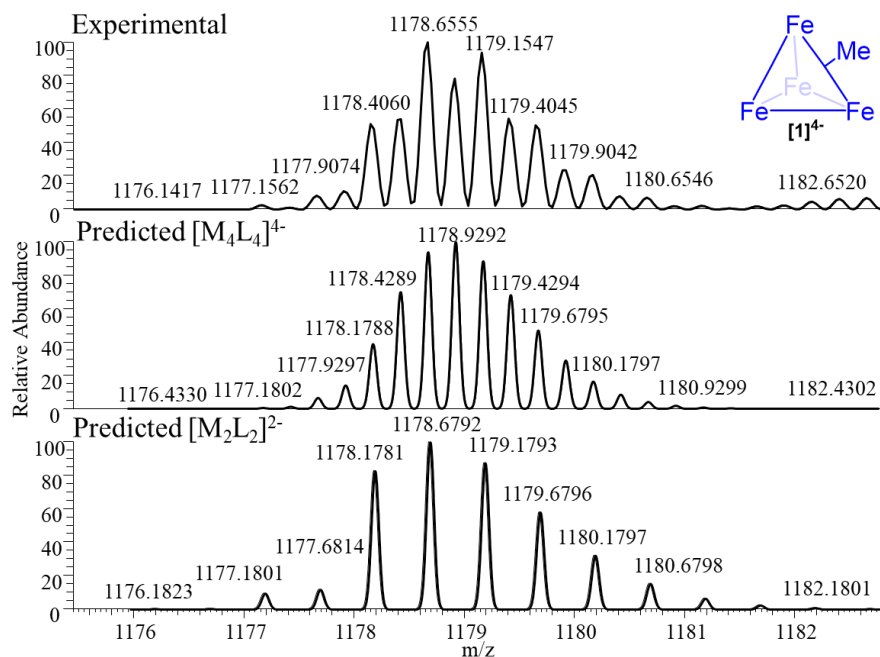

**Figure S-27.** Expansion of the ESI-MS spectrum of **1•SbF<sub>6</sub>**, showing obtained and simulated isotope regions [1]<sup>4+</sup>+ [Fe<sub>2</sub>L<sub>2</sub>]<sup>2-</sup>. Related to Figure 1 and STAR methods, ESI-MS spectrum of cage **1•SbF<sub>6</sub>**.

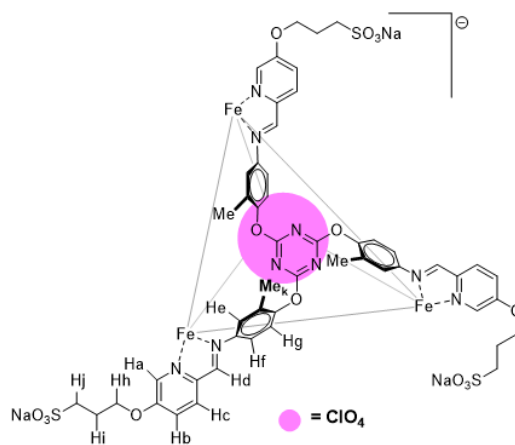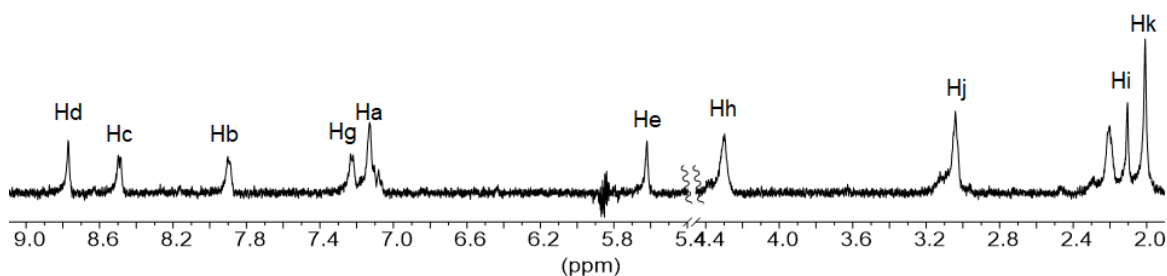

**Figure S-28.** <sup>1</sup>H NMR spectrum of cage **1•ClO<sub>4</sub>**. The peak for H<sub>f</sub> is under the HDO peak (D<sub>2</sub>O, 600 MHz, 298K). Related to Figure 1 and STAR methods, synthesis of cage **1•ClO<sub>4</sub>**.

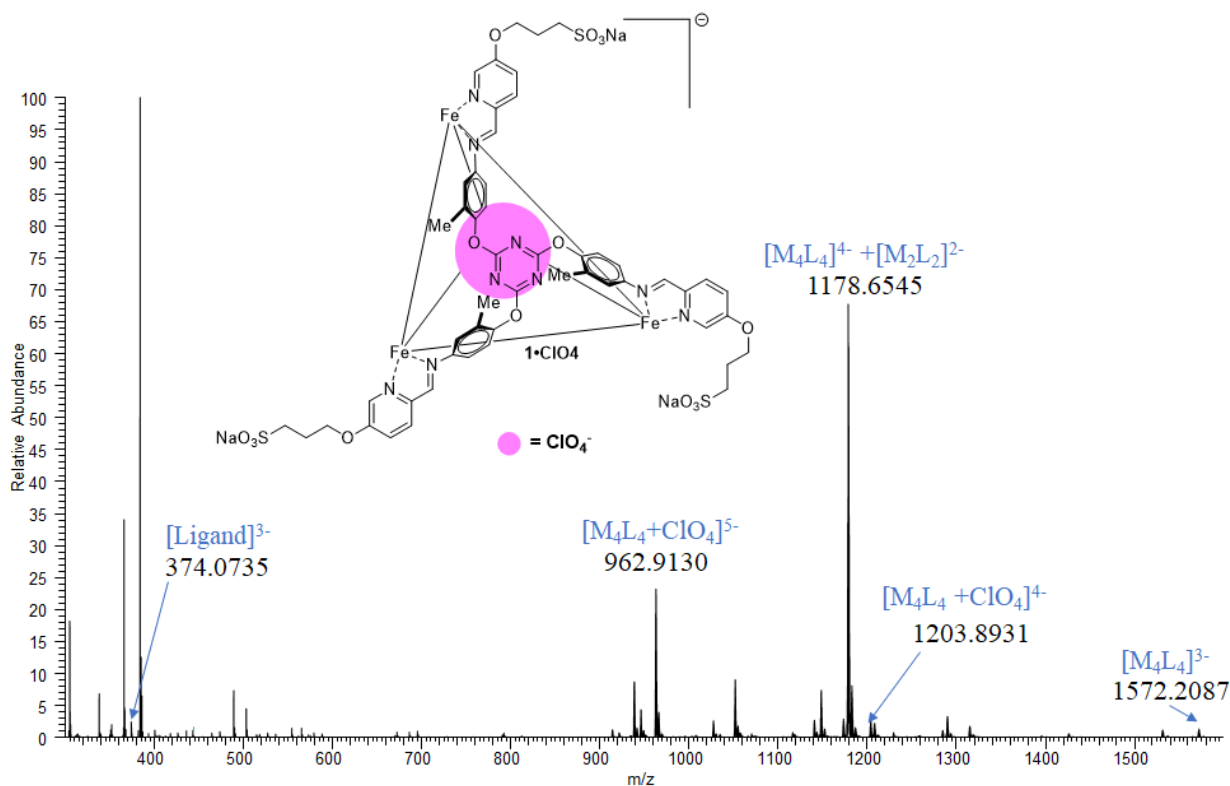

**Figure S-29.** ESI-MS spectrum of cage  $1 \cdot \text{ClO}_4$ . The flow rate, sheath gas flow rate, aux gas flow rate, spray voltage, capillary temperature, and the S-lens RF level were set to be 5  $\mu\text{l}/\text{min}$ , 5 arb, 10 arb, 3.5 kV, 200 C, and 20% respectively. Full mass spectra were acquired with a resolution of  $r = 15,000$ . Related to Figure 1 and STAR methods, ESI-MS spectrum of cage  $1 \cdot \text{ClO}_4$ .

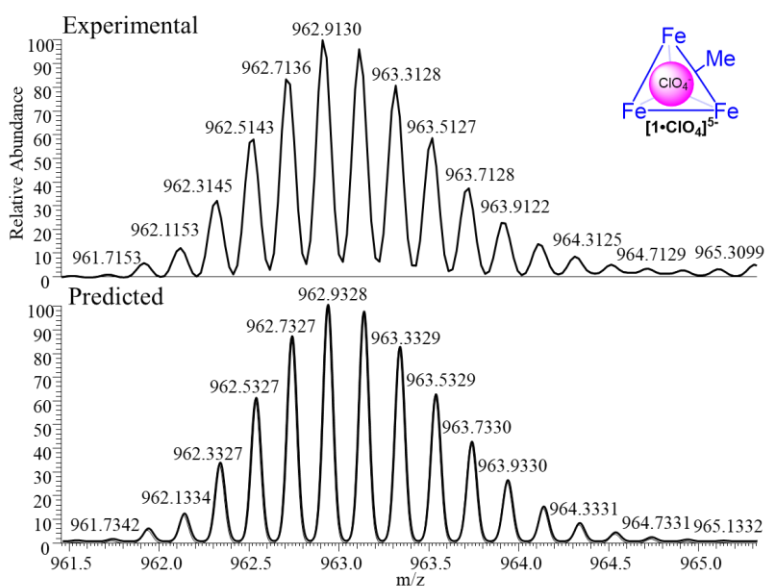

**Figure S-30.** Expansion of the ESI-MS spectrum of  $1 \cdot \text{ClO}_4$ , showing obtained and simulated isotope region  $[\text{M}_4\text{L}_4 + \text{ClO}_4]^{5-}$ . Related to Figure 1 and STAR methods, ESI-MS spectrum of cage  $1 \cdot \text{ClO}_4$ .

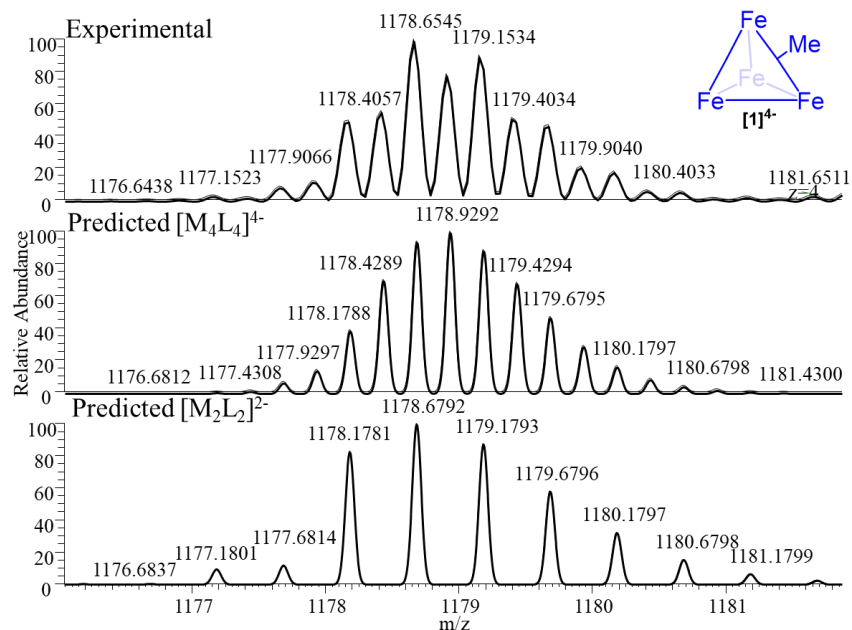

**Figure S-31.** Expansion of the ESI-MS spectrum of **1**·ClO<sub>4</sub>, showing obtained and simulated isotope region [1]<sup>4+</sup> + [Fe<sub>2</sub>L<sub>2</sub>]<sup>2-</sup>. Related to Figure 1 and STAR methods, ESI-MS spectrum of cage **1**·ClO<sub>4</sub>.

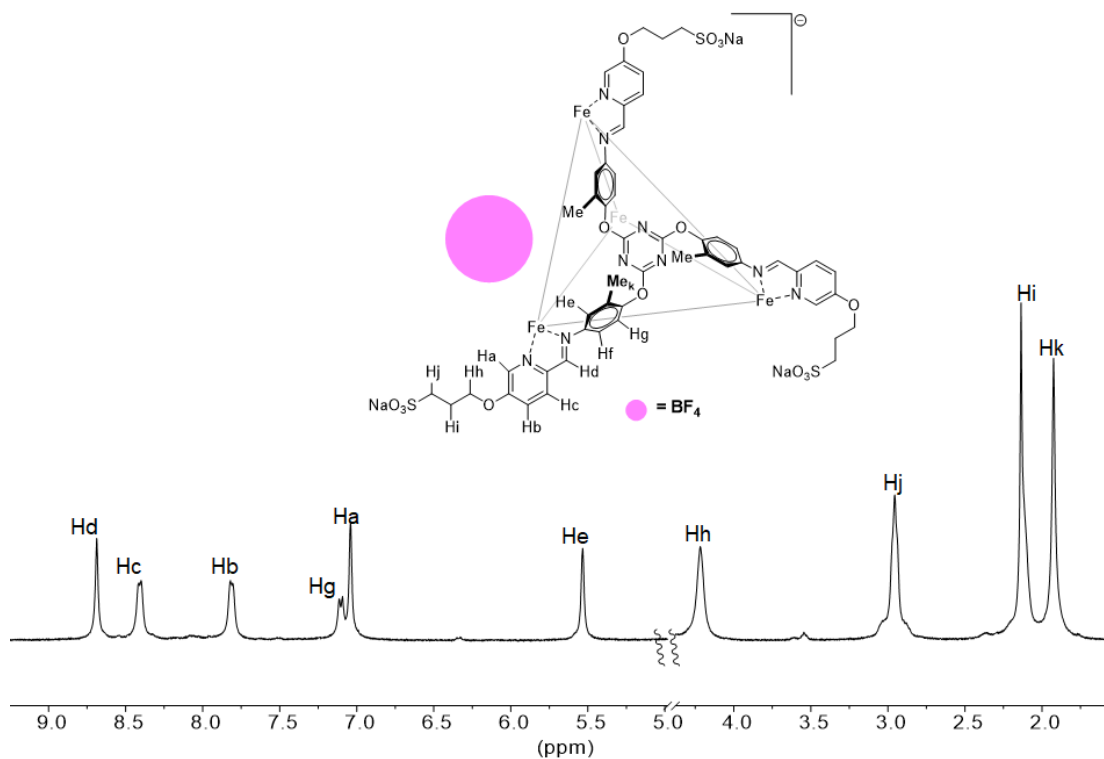

**Figure S-32.** <sup>1</sup>H NMR spectrum of cage **1**, made with Fe(NTf<sub>2</sub>)<sub>2</sub> and NaBF<sub>4</sub>. The peak for H<sub>f</sub> is under the HDO peak (D<sub>2</sub>O, 400 MHz, 298K). Related to Figure 1 and STAR methods, Synthesis of **1**, made with Fe(NTf<sub>2</sub>)<sub>2</sub> and NaBF<sub>4</sub>.

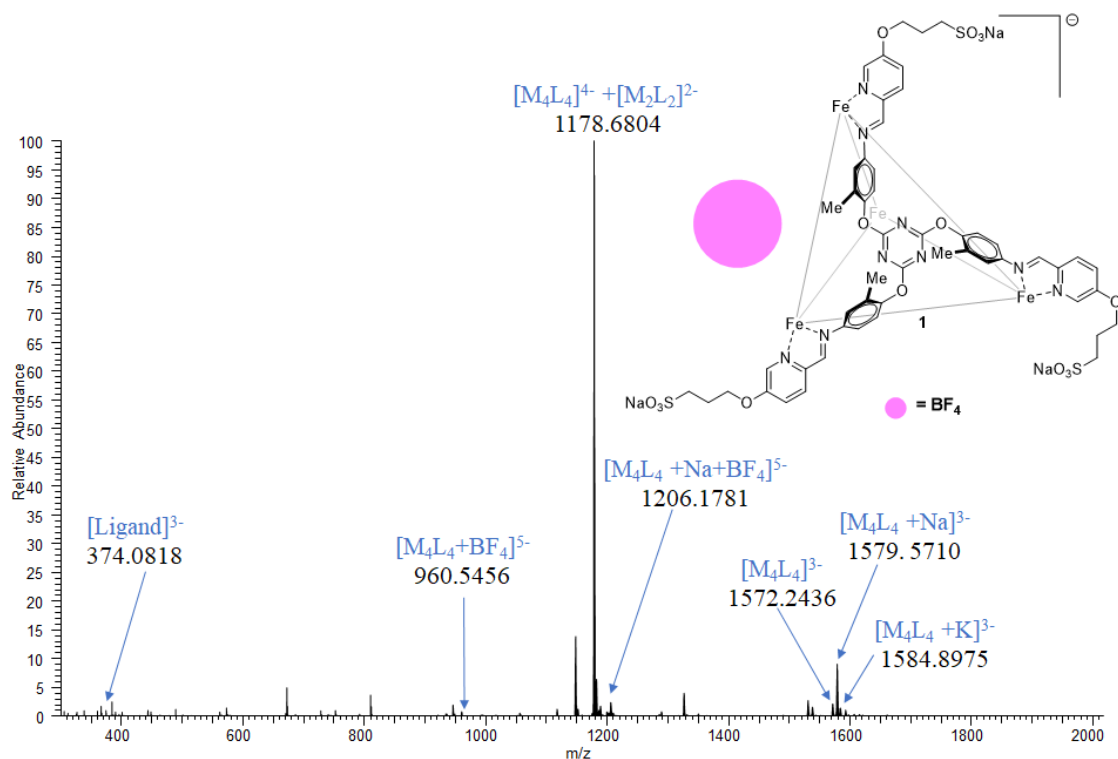

**Figure S-33.** ESI-MS spectrum of cage 1, made with Fe(NTf<sub>2</sub>)<sub>2</sub> and NaBF<sub>4</sub>. The flow rate, sheath gas flow rate, aux gas flow rate, spray voltage, capillary temperature, and the S-lens RF level were set to be 3 ul/min, 5 arb, 10 arb, 3.2 kV, 200 C, and 40% respectively. Full mass spectra were acquired with a resolution of  $r = 30,000$ . Related to Figure 1 and STAR methods, ESI-MS spectrum of cage 1, made with Fe(NTf<sub>2</sub>)<sub>2</sub> and NaBF<sub>4</sub>.

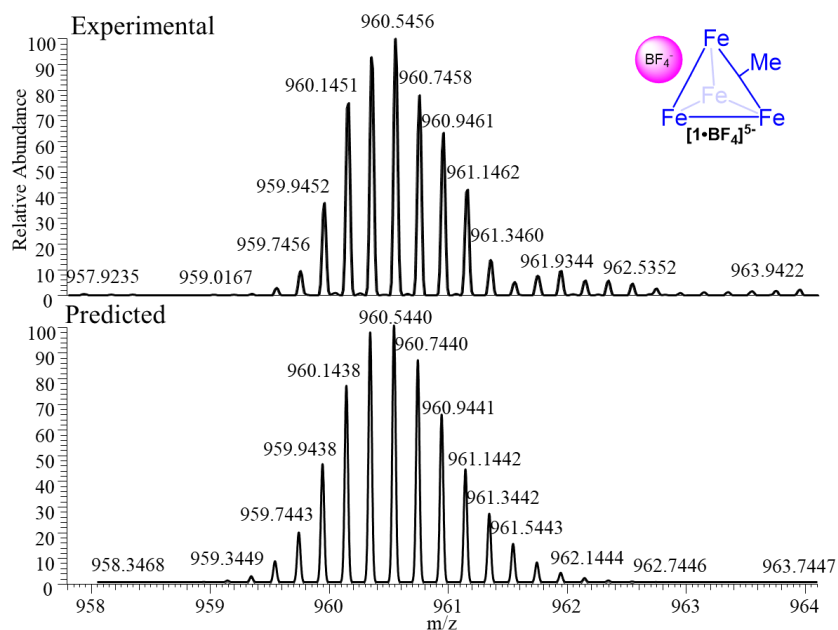

**Figure S-34.** Expansion of the ESI-MS spectrum of 1, made with Fe(NTf<sub>2</sub>)<sub>2</sub> and NaBF<sub>4</sub>, showing obtained and simulated isotope region [1 + BF<sub>4</sub>]<sup>5-</sup>. Related to Figure 1 and STAR methods, ESI-MS spectrum of cage 1, made with Fe(NTf<sub>2</sub>)<sub>2</sub> and NaBF<sub>4</sub>.

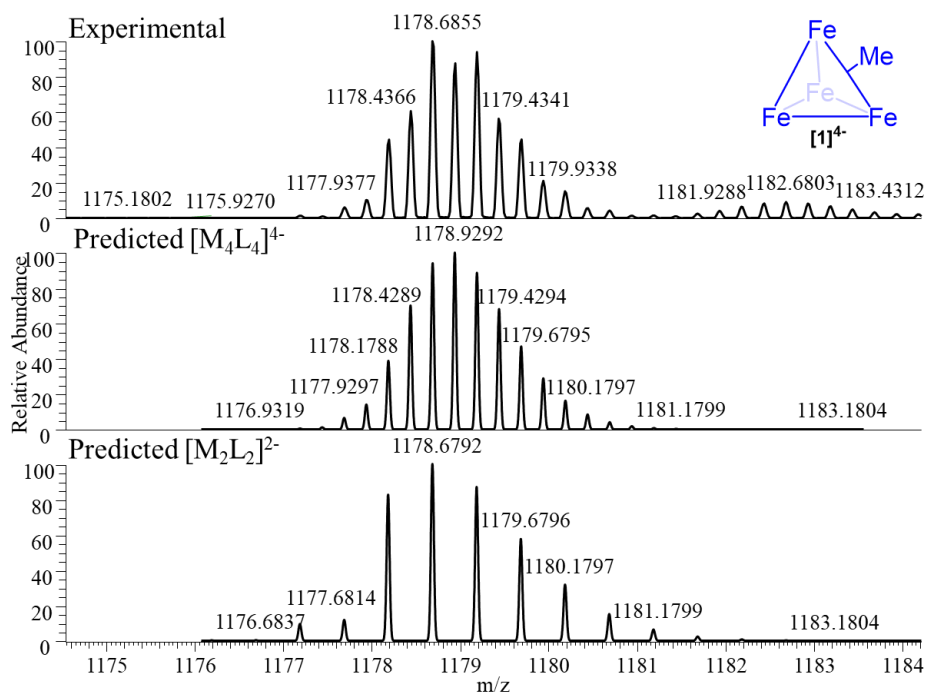

**Figure S-35.** Expansion of the ESI-MS spectrum of **1**, made with  $\text{Fe}(\text{NTf}_2)_2$  and  $\text{NaBF}_4$ , showing obtained and simulated isotope region  $[\mathbf{1}]^{4-} + [\text{Fe}_2\text{L}_2]^{2-}$ . Related to Figure 1 and STAR methods, ESI-MS spectrum of cage **1**, made with  $\text{Fe}(\text{NTf}_2)_2$  and  $\text{NaBF}_4$ .

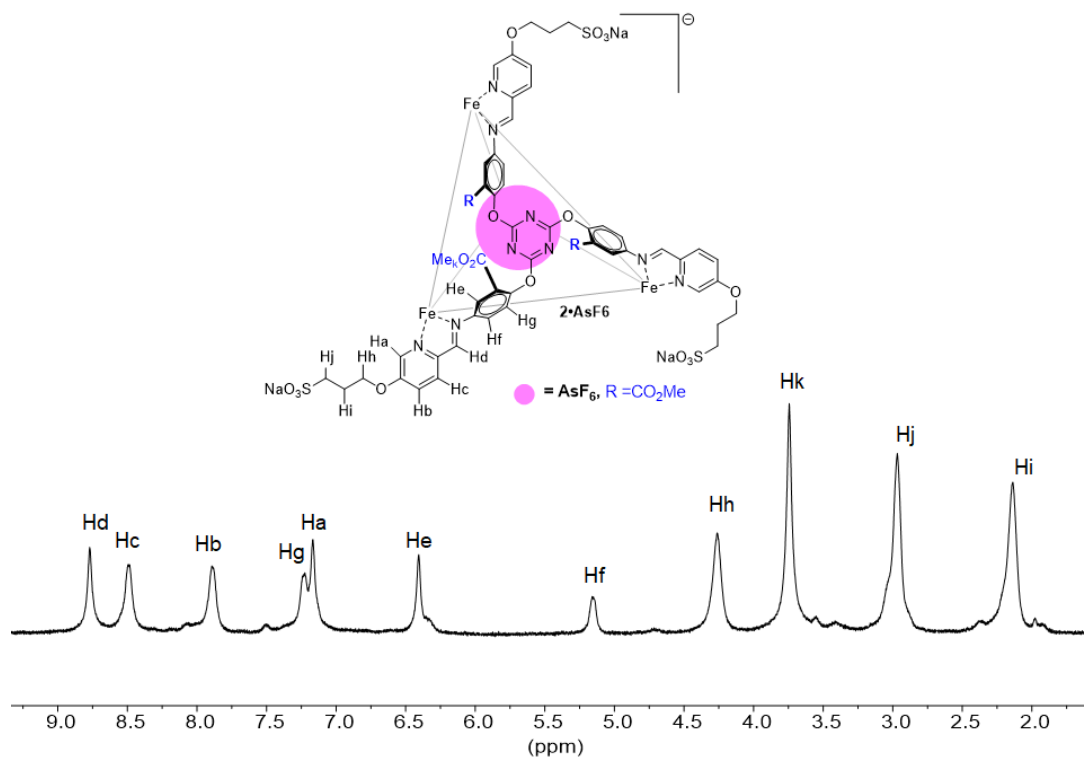

**Figure S-36.**  $^1\text{H}$  NMR spectrum of cage  $2 \cdot \text{AsF}_6$  ( $\text{D}_2\text{O}$ , 400 MHz, 298K). Related to Figure 1 and STAR methods, Synthesis of cage  $2 \cdot \text{AsF}_6$ .

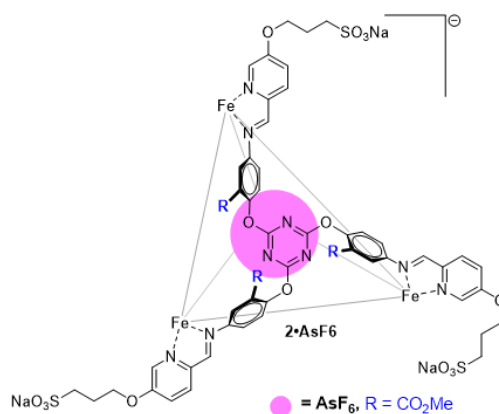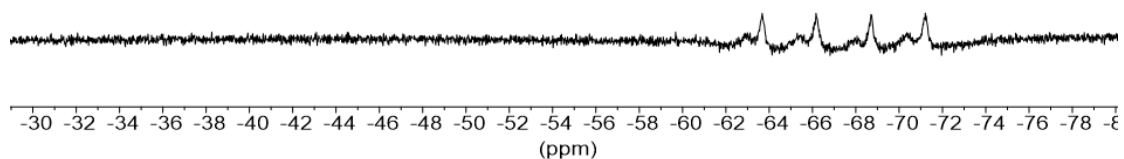

**Figure S-37.**  $^{19}\text{F}$  NMR spectrum of cage  $2 \cdot \text{AsF}_6$  ( $\text{D}_2\text{O}$ , 376 MHz, 298K). Related to Figure 1 and STAR methods, Synthesis of cage  $2 \cdot \text{AsF}_6$ .

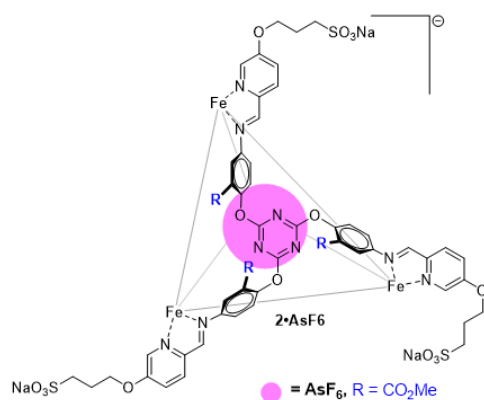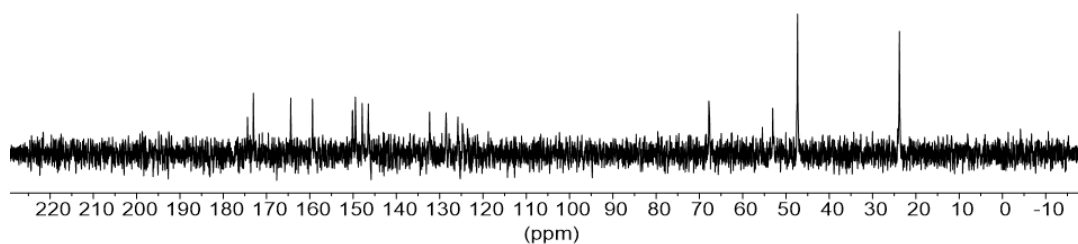

**Figure S-38.**  $^{13}\text{C}\{^1\text{H}\}$  NMR spectrum of cage  $2 \cdot \text{AsF}_6$  ( $\text{D}_2\text{O}$ , 101 MHz, 298K). The low solubility of the complex precluded a high signal to noise ratio in any reasonable amount of time. Related to Figure 1 and STAR methods, Synthesis of cage  $2 \cdot \text{AsF}_6$ .

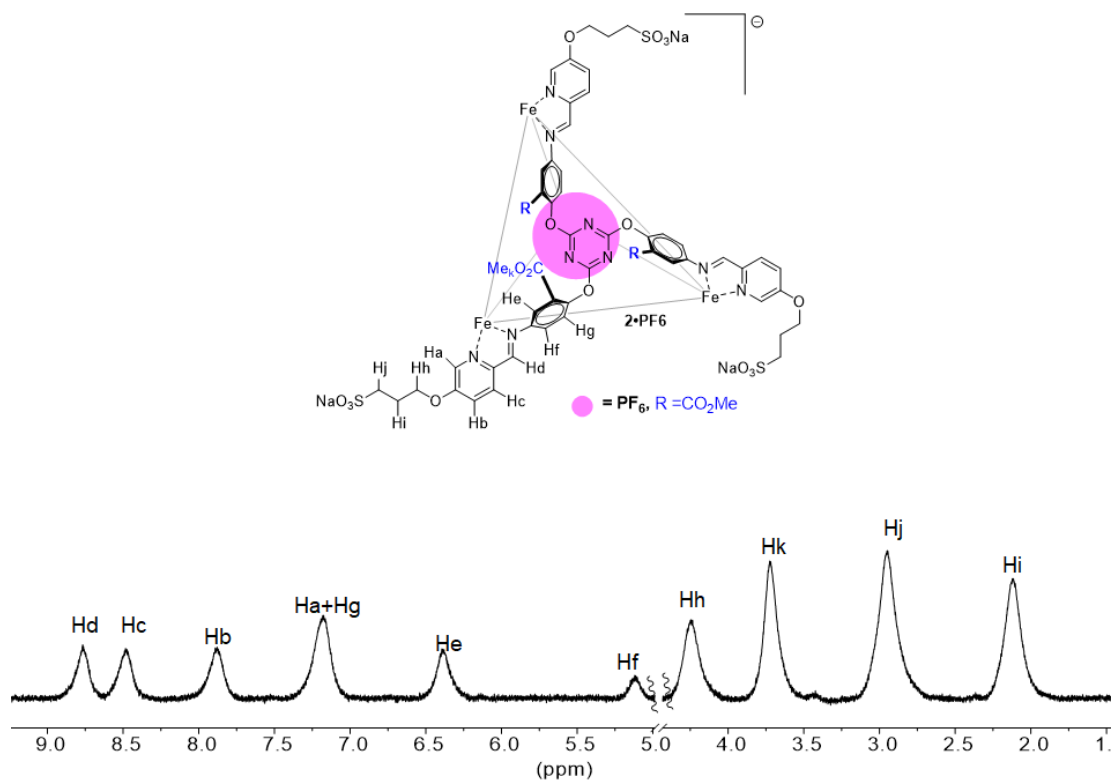

**Figure S-39.**  $^1\text{H}$  NMR spectrum of cage  $2 \cdot \text{PF}_6$  ( $\text{D}_2\text{O}$ , 400 MHz, 298K). Related to Figure 1 and STAR methods, Synthesis of cage  $2 \cdot \text{PF}_6$ .

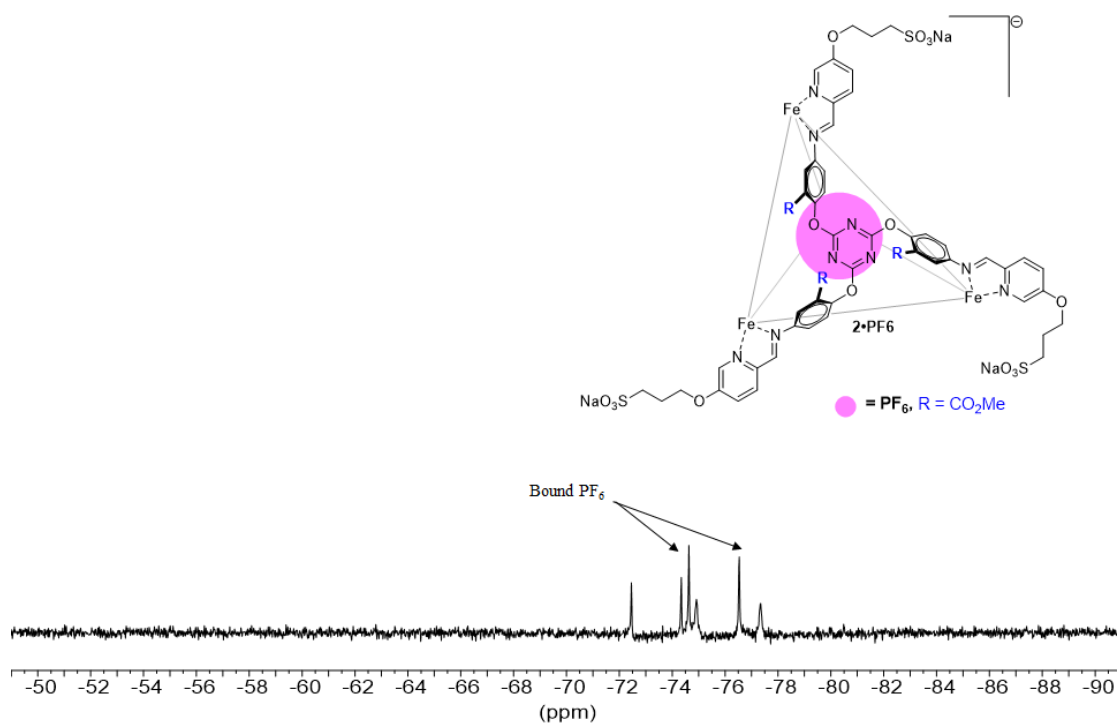

**Figure S-40.**  $^{19}\text{F}$  NMR spectrum of cage  $2 \cdot \text{PF}_6$  ( $\text{D}_2\text{O}$ , 376 MHz, 298K). Related to Figure 1 and STAR methods, Synthesis of cage  $2 \cdot \text{PF}_6$ .

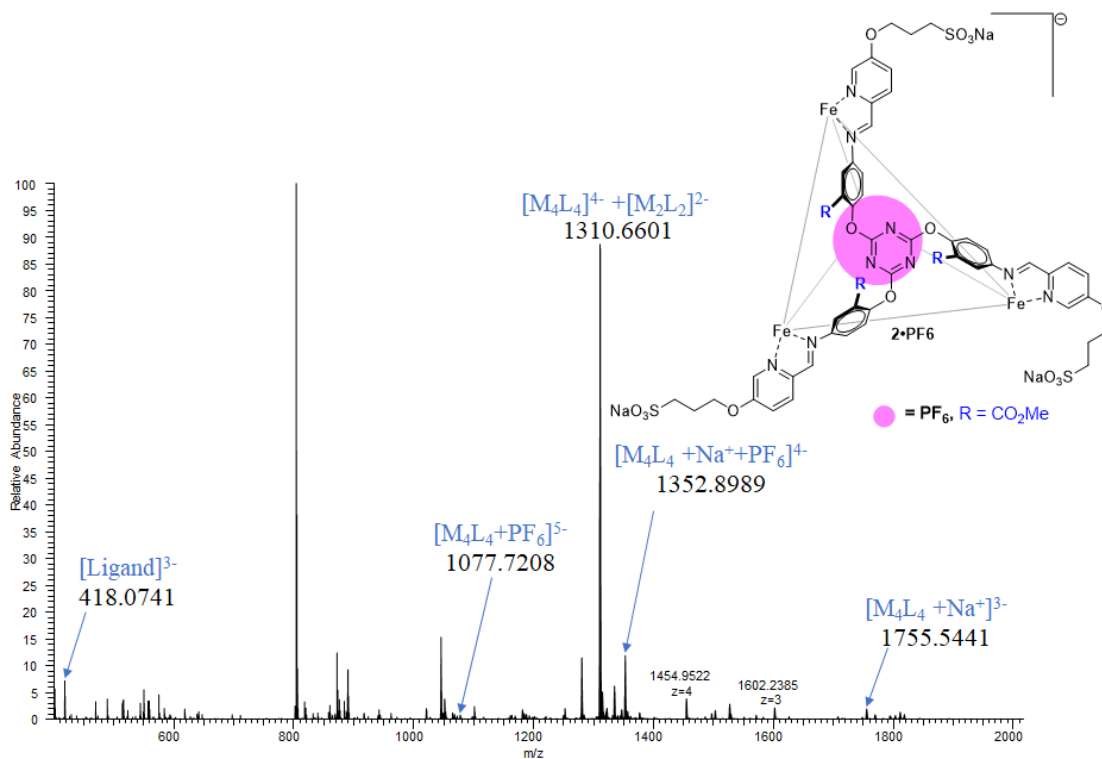

**Figure S-41.** ESI-MS spectrum of cage **2•PF<sub>6</sub>**. The flow rate, sheath gas flow rate, aux gas flow rate, spray voltage, capillary temperature, and the S-lens RF level were set to be 3  $\mu$ l/min, 5 arb, 10 arb, 3.5 kV, 200 C, and 50% respectively. Full mass spectra were acquired with a resolution of  $r = 30,000$ . Related to Figure 1 and STAR methods, ESI-MS spectrum of cage **2•PF<sub>6</sub>**.

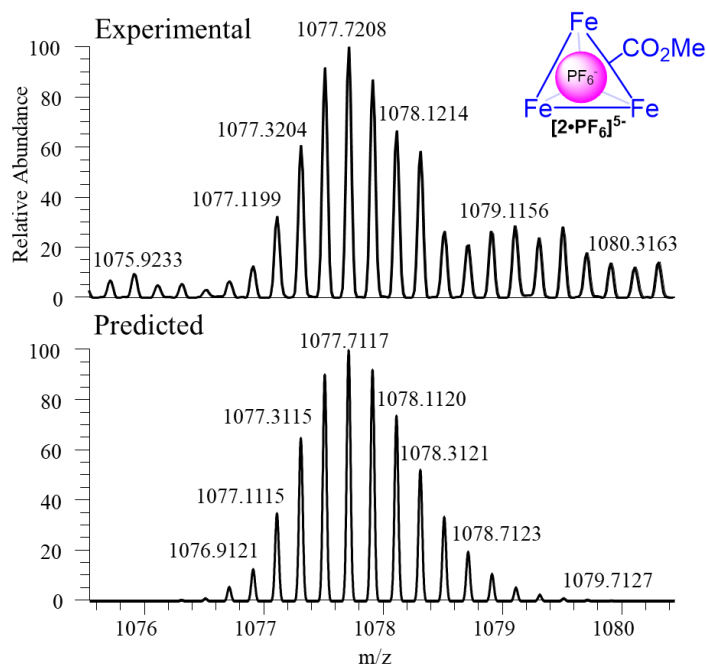

**Figure S-42.** Expansion of the ESI-MS spectrum of **2•PF<sub>6</sub>**, showing obtained and simulated isotope region  $[2\bullet PF_6]^{5-}$ . Related to Figure 1 and STAR methods, ESI-MS spectrum of cage **2•PF<sub>6</sub>**.



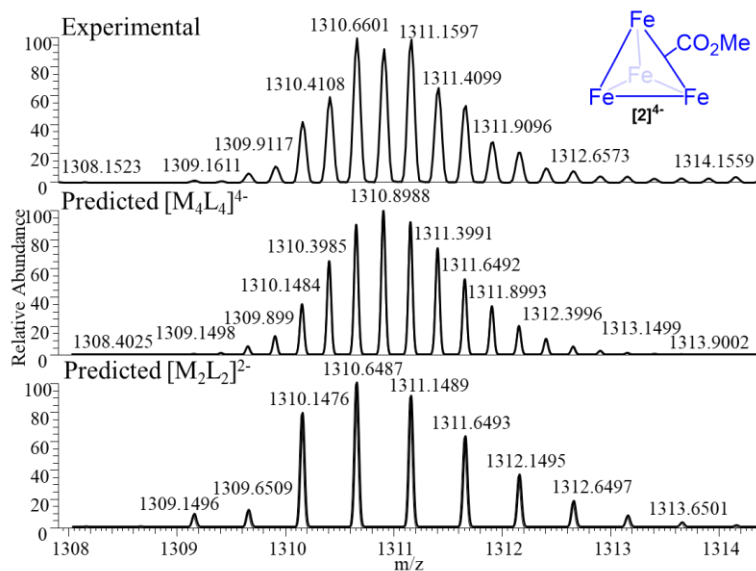

**Figure S-43.** Expansion of the ESI-MS spectrum of **2•PF<sub>6</sub>**, showing obtained and simulated isotope region  $[2]^{4+} + [Fe_2L_2]^{2-}$ . Related to Figure 1 and STAR methods, ESI-MS spectrum of cage **2•PF<sub>6</sub>**.

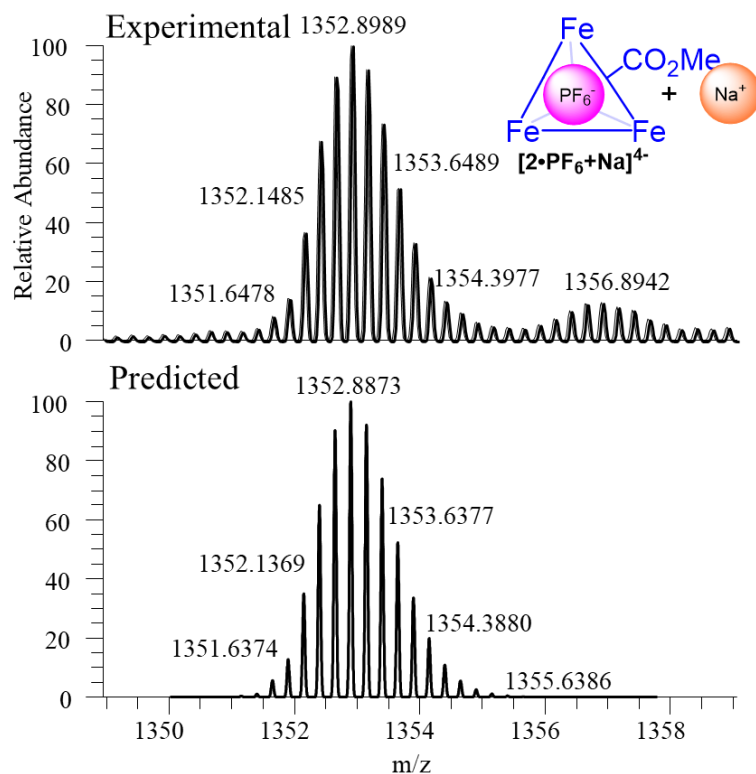

**Figure S-44.** Expansion of the ESI-MS spectrum of **2•PF<sub>6</sub>**, showing obtained and simulated isotope region  $[2•PF_6+Na]^{4+}$ . Related to Figure 1 and STAR methods, ESI-MS spectrum of cage **2•PF<sub>6</sub>**.

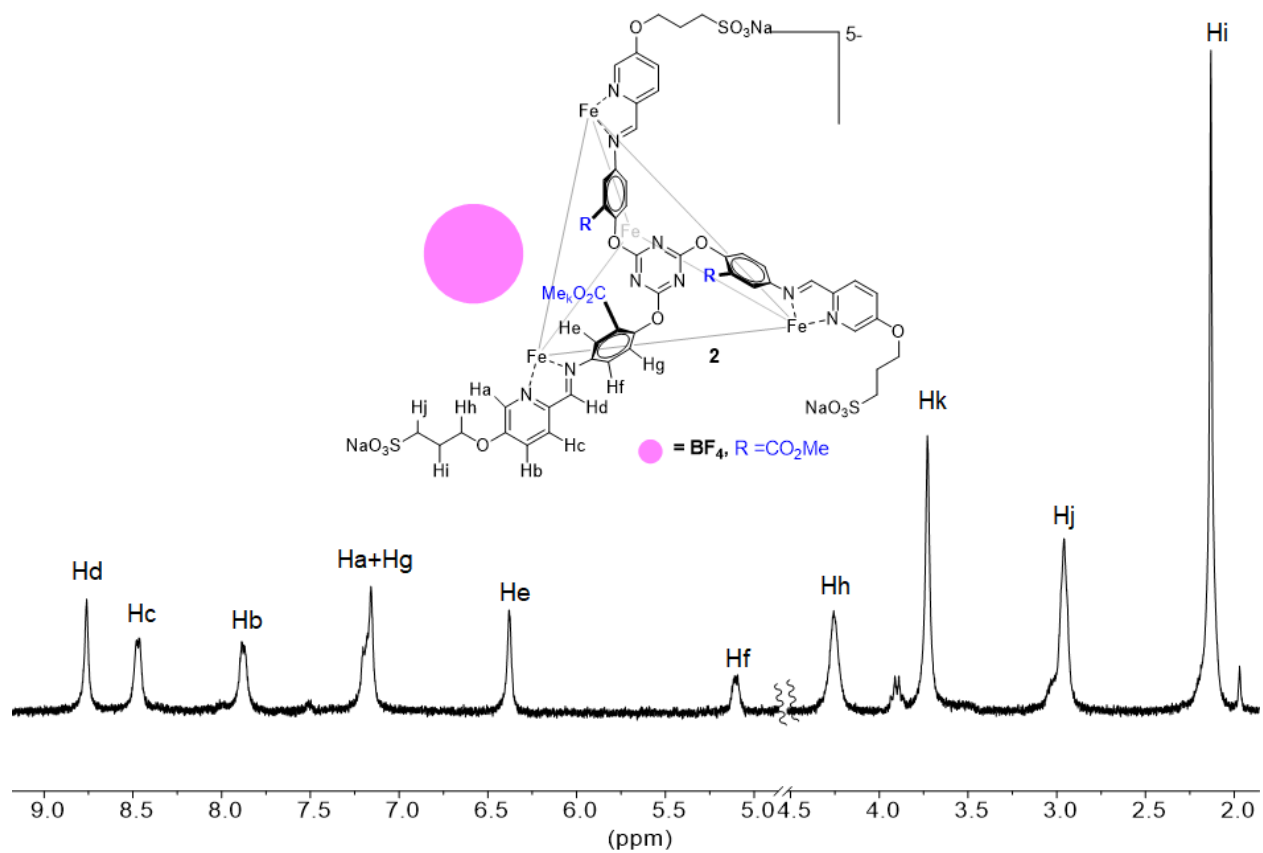

**Figure S-45.** <sup>1</sup>H NMR spectrum of cage **2**, made with Fe(NTf<sub>2</sub>)<sub>2</sub> and NaBF<sub>4</sub> (D<sub>2</sub>O, 400 MHz, 298K). Related to Figure 1 and STAR methods, Synthesis of **2**, made with Fe(NTf<sub>2</sub>)<sub>2</sub> and NaBF<sub>4</sub>.

## Anion Recognition: Binding in Unoccupied Cages

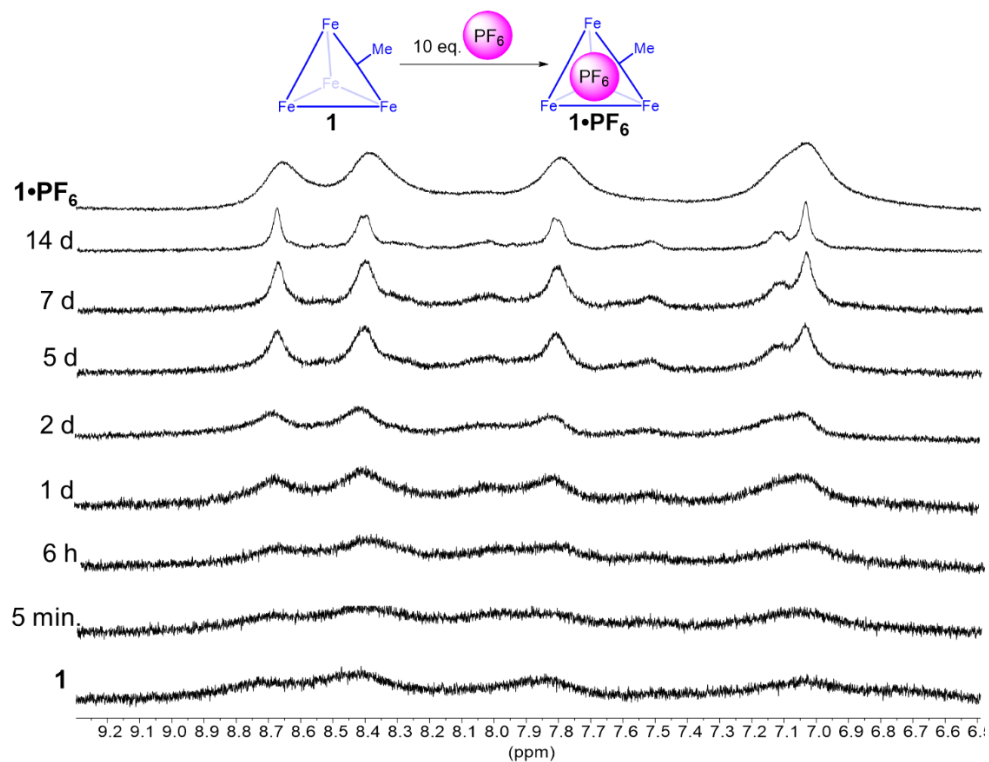

**Figure S-46.**  $^1\text{H}$  NMR spectra of **1** with 10 equivalents of  $\text{NaPF}_6$  added, over 14 days ( $\text{D}_2\text{O}$ , 400 MHz, 298K). Related to Figure 5.

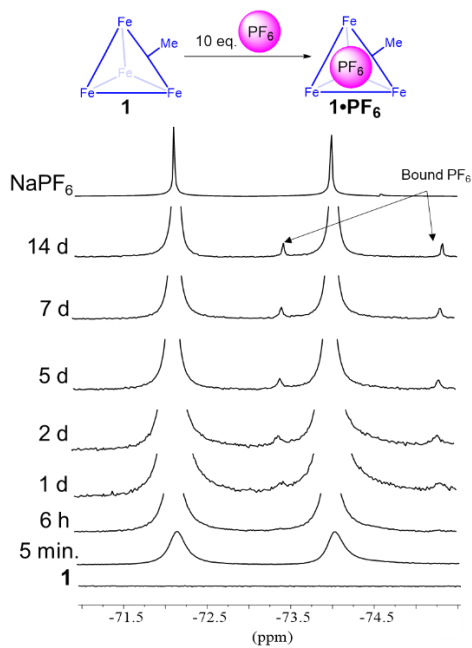

**Figure S-47.**  $^{19}\text{F}$  NMR spectra of **1** with 10 equivalents of  $\text{NaPF}_6$  added, over 14 d ( $\text{D}_2\text{O}$ , 376 MHz, 298K). Related to Figure 5.

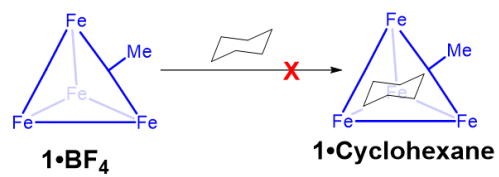

a)  $\text{1}\cdot\text{BF}_4$   
+Cyclohexane

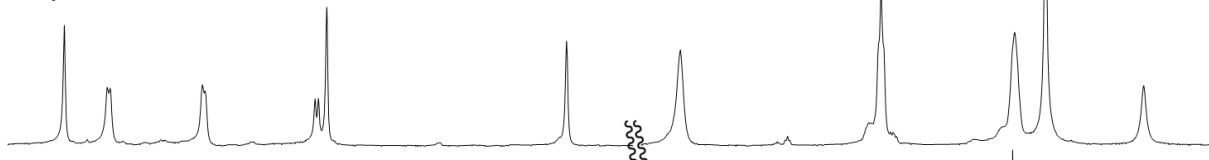

b)  $\text{1}\cdot\text{BF}_4$

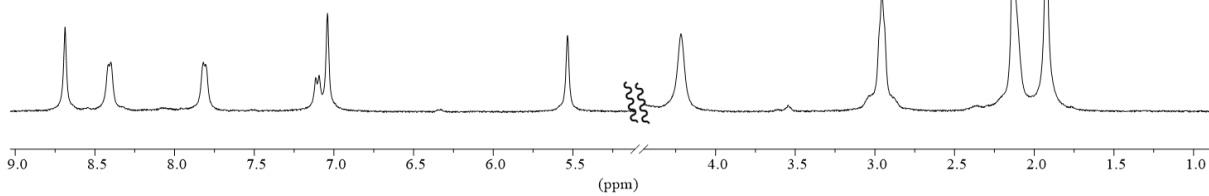

**Figure S-48.**  $^1\text{H}$  NMR spectrum of a) **1**, made with  $\text{Fe}(\text{NTf}_2)_2$  and  $\text{NaBF}_4$  with 10 equivalents of cyclohexane added and b)  $\text{1}\cdot\text{BF}_4$  ( $\text{D}_2\text{O}$ , 400 MHz, 298K). Related to Figure 7.

## Anion Recognition: Anion Exchange Experiments in Occupied Cages

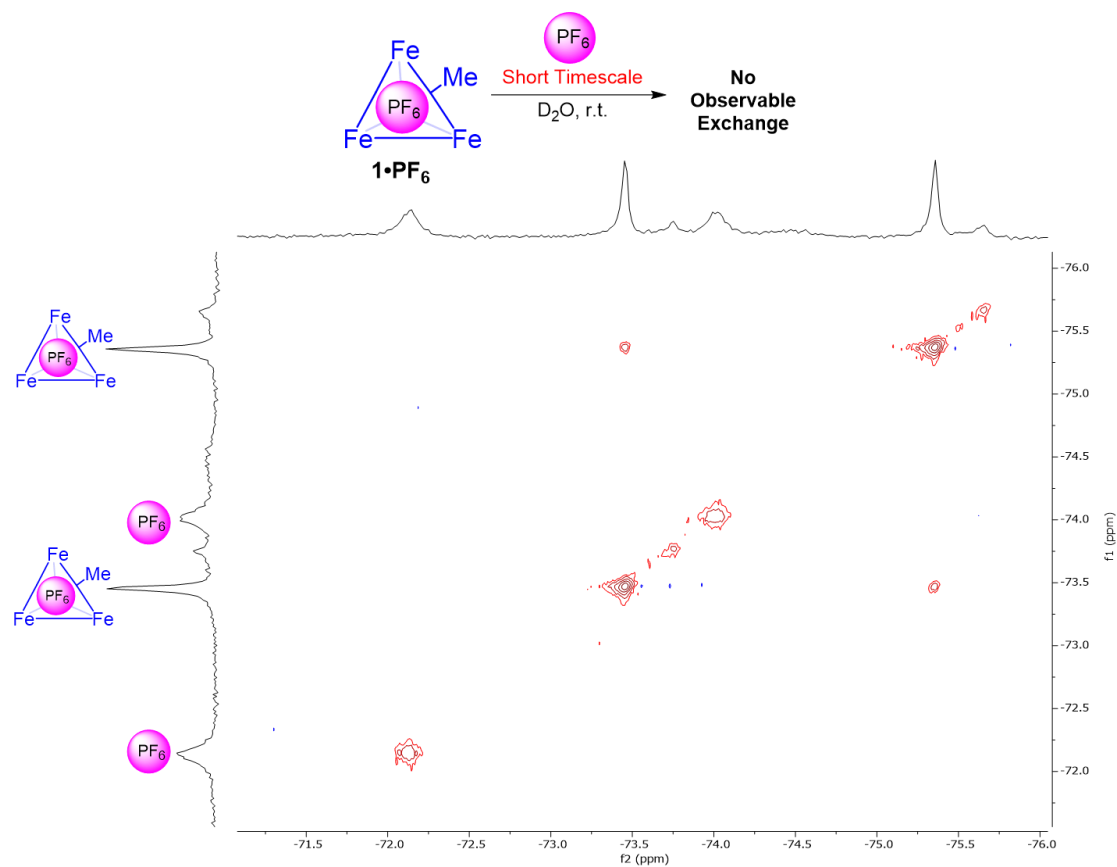

**Figure S-49.**  $^{19}\text{F}$ - $^{19}\text{F}$  EXSY NMR spectrum of  $1 \cdot \text{PF}_6$  (2 mM,  $\text{D}_2\text{O}$ , 376 MHz, 300 ms mixing time, 298K). Related to Figure 4.

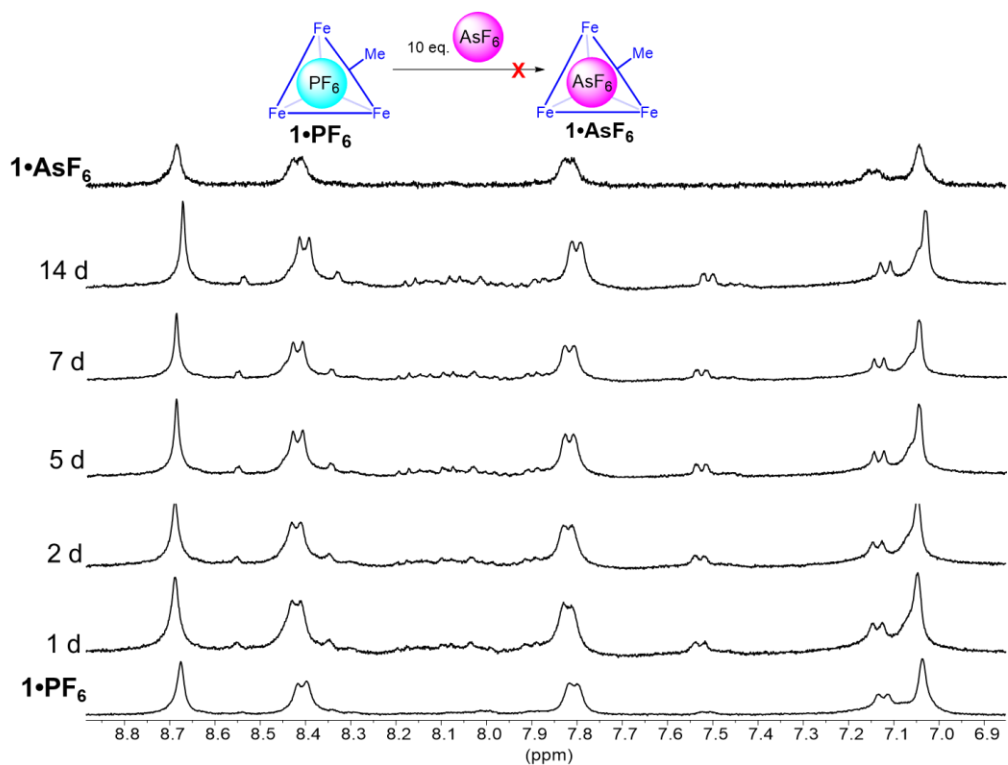

**Figure S-50.**  $^1\text{H}$  NMR spectra of  $1\cdot\text{PF}_6$  with 10 equivalents of  $\text{NaAsF}_6$ , over 14 days ( $\text{D}_2\text{O}$ , 400 MHz, 298K). Related to Figure 4.

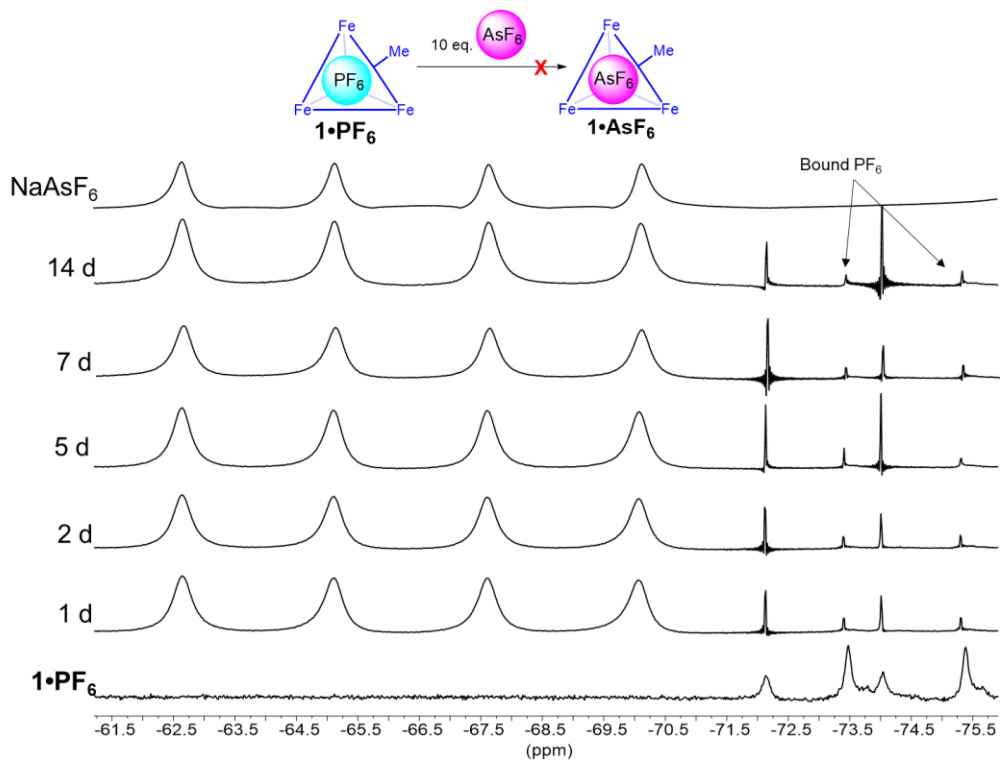

**Figure S-51.**  $^{19}\text{F}$  NMR spectra of  $1\cdot\text{PF}_6$  with 10 equivalents of  $\text{NaAsF}_6$ , over 14 days ( $\text{D}_2\text{O}$ , 376 MHz, 298K). Related to Figure 4.

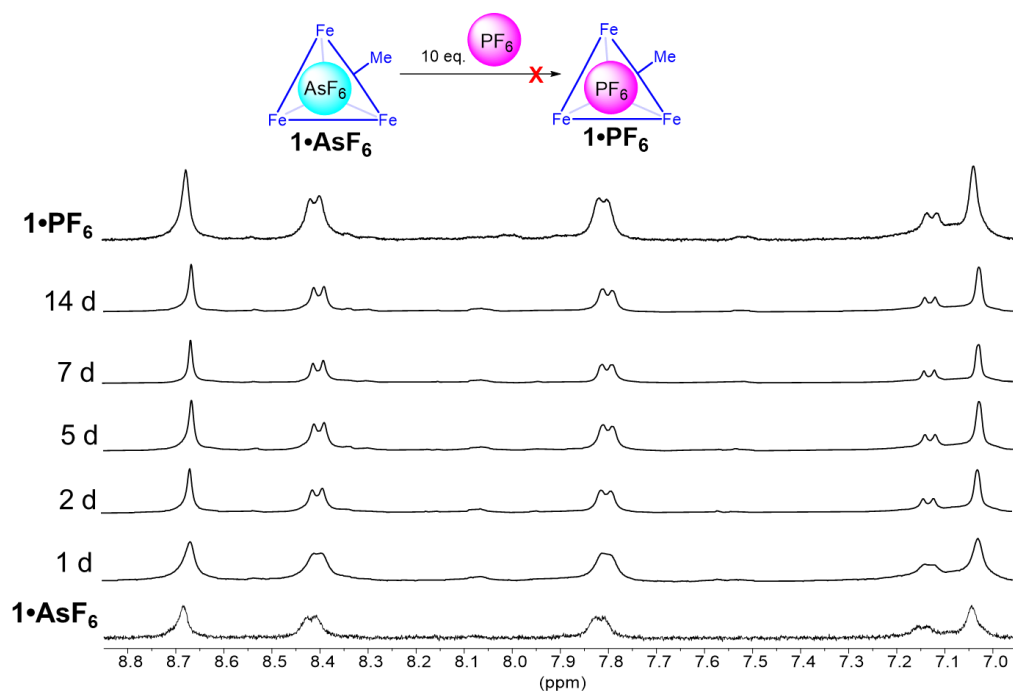

**Figure S-52.**  $^1\text{H}$  NMR spectra of  $1\cdot\text{AsF}_6$  with 10 equivalents of  $\text{NaPF}_6$ , over 14 days ( $\text{D}_2\text{O}$ , 400 MHz, 298K). Related to Figure 4.

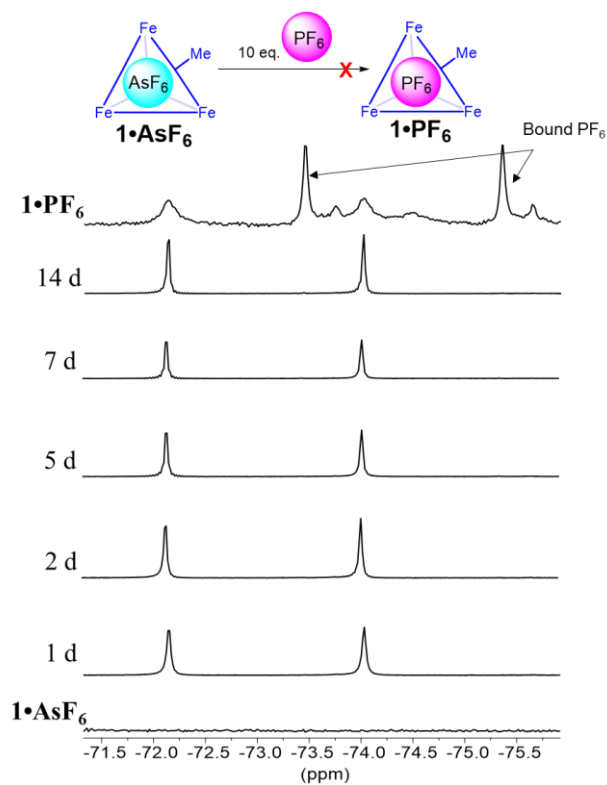

**Figure S-53.**  $^{19}\text{F}$  NMR spectra of  $1\cdot\text{AsF}_6$  with 10 equivalents of  $\text{NaPF}_6$ , over 14 days ( $\text{D}_2\text{O}$ , 376 MHz, 298K). Related to Figure 4.

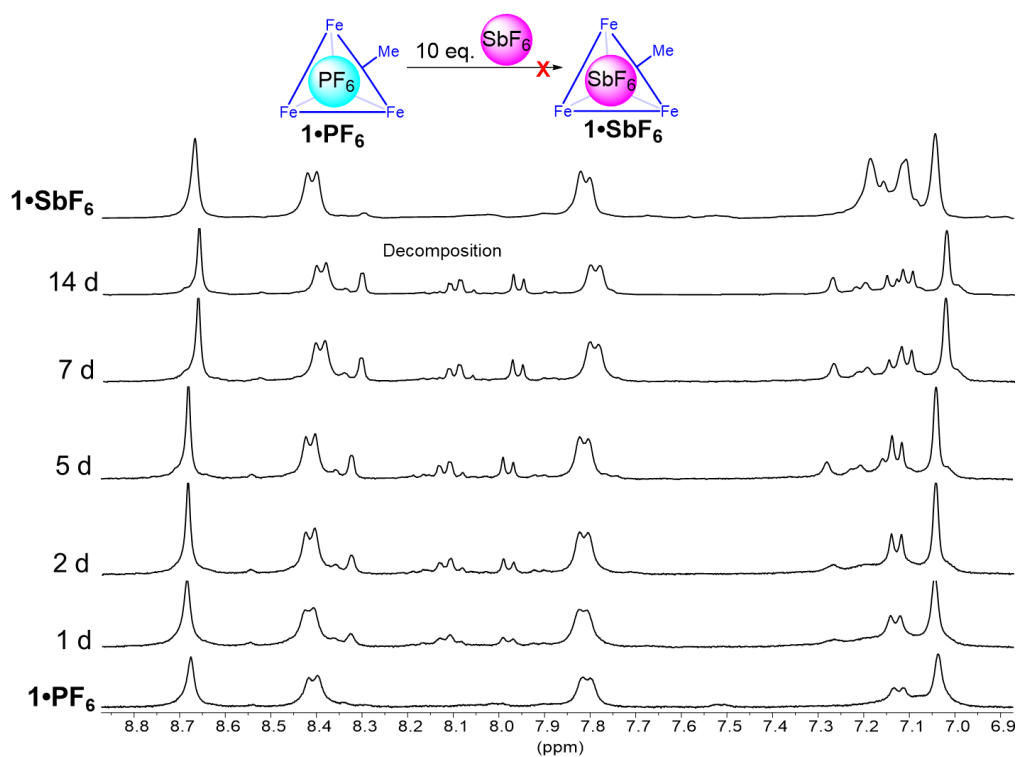

**Figure S-54.**  $^1\text{H}$  NMR spectra of  $1\cdot\text{PF}_6$  with 10 equivalents of  $\text{NaSbF}_6$ , over 14 days ( $\text{D}_2\text{O}$ , 400 MHz, 298 K). Related to Figure 7.

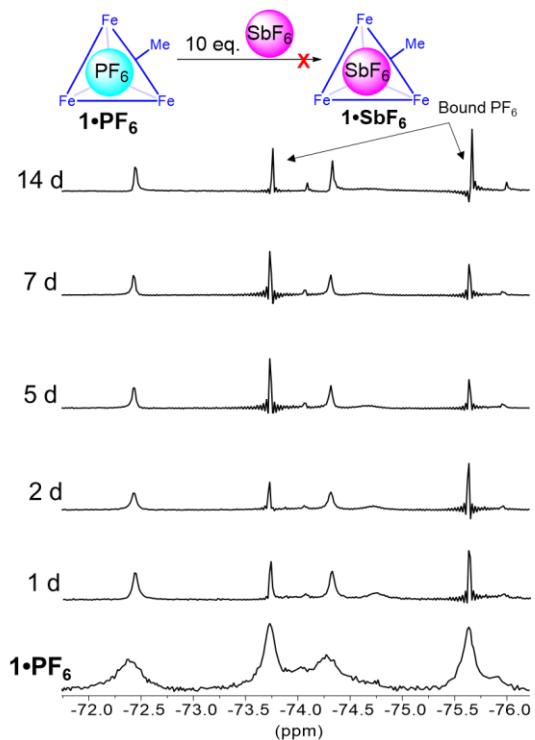

**Figure S-55.**  $^{19}\text{F}$  NMR spectra of  $1\cdot\text{PF}_6$  with 10 equivalents of  $\text{NaSbF}_6$ , over 14 days ( $\text{D}_2\text{O}$ , 376 MHz, 298K). Related to Figure 7.



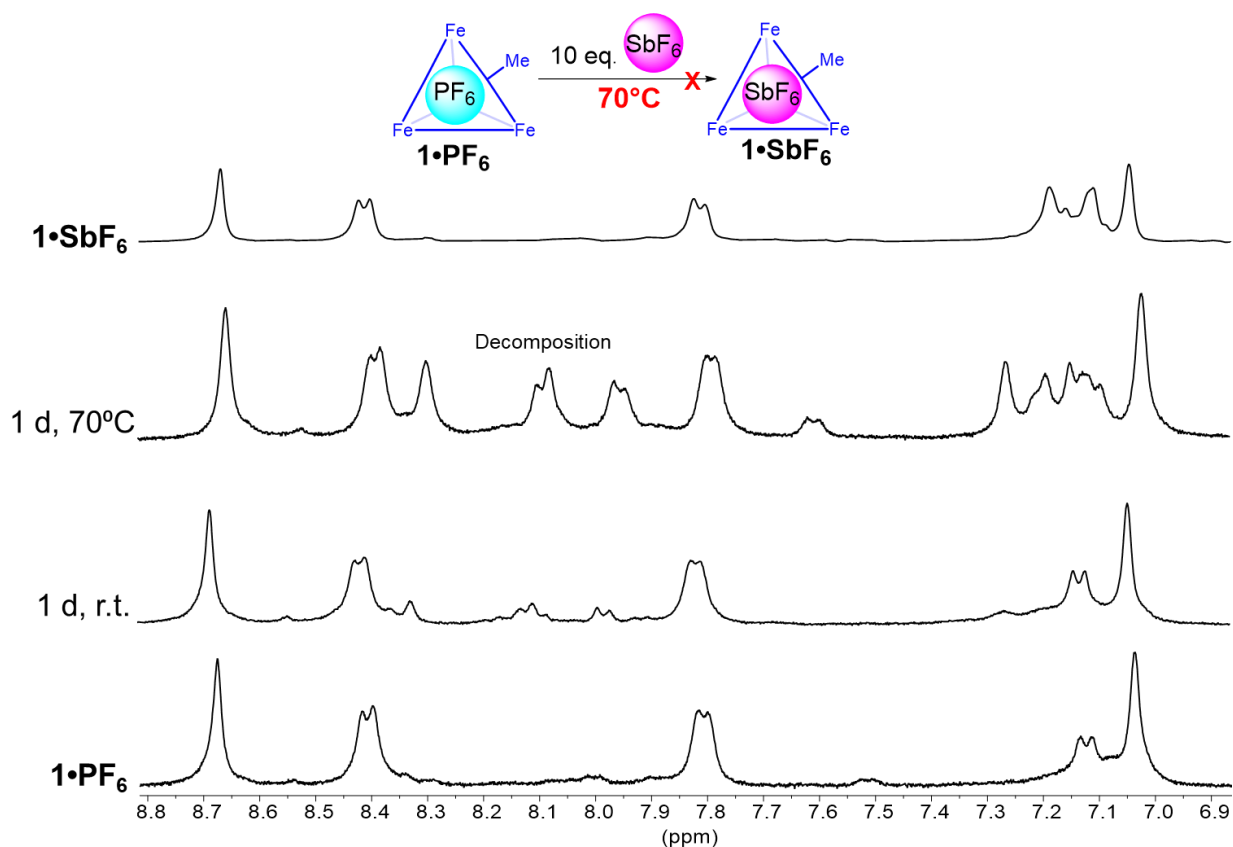

**Figure S-56.**  $^1\text{H}$  NMR spectra of  $1 \cdot \text{PF}_6$  with 10 equivalents of  $\text{NaSbF}_6$ , over 1 day at  $70^\circ\text{C}$  ( $\text{D}_2\text{O}$ , 400 MHz, 298K/343K). Related to Figure 7.

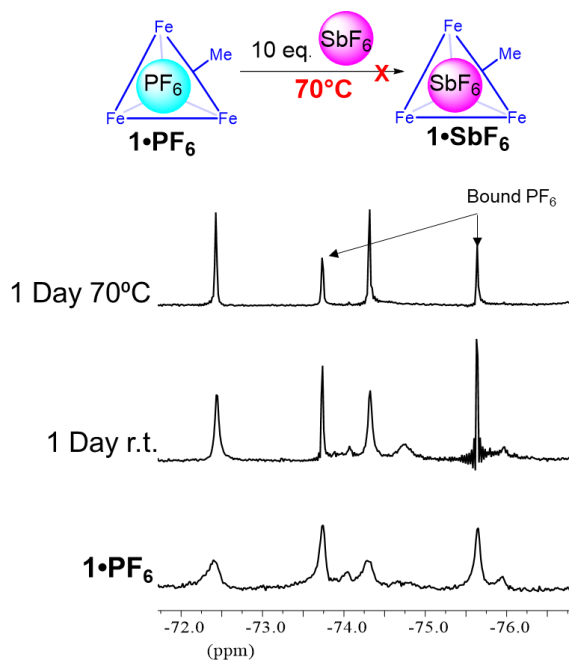

**Figure S-57.**  $^{19}\text{F}$  NMR spectra of  $1 \cdot \text{PF}_6$  with 10 equivalents of  $\text{NaSbF}_6$ , over 1 day at  $70^\circ\text{C}$  ( $\text{D}_2\text{O}$ , 376 MHz, 298K/343K). Related to Figure 7.

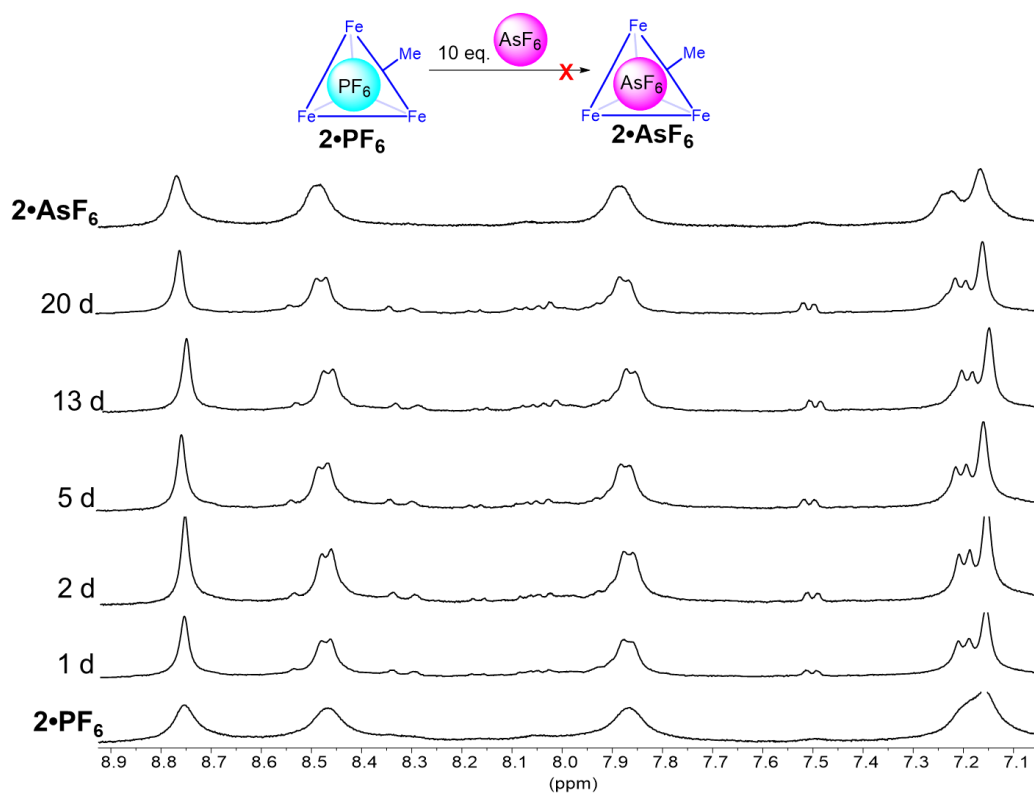

**Figure S-58.**  $^1\text{H}$  NMR spectra of  $2\cdot\text{PF}_6$  with 10 equivalents of  $\text{NaAsF}_6$ , over 14 days ( $\text{D}_2\text{O}$ , 400 MHz, 298K). Related to Figure 7.

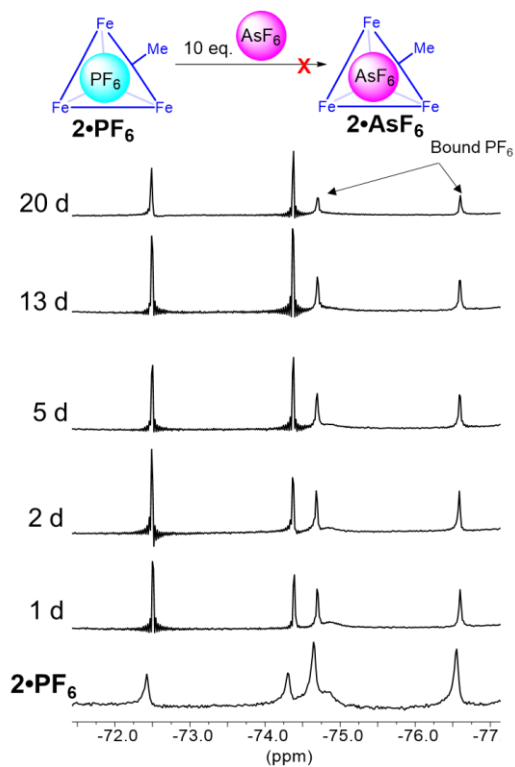

**Figure S-59.**  $^{19}\text{F}$  NMR spectra of  $2\cdot\text{PF}_6$  with 10 equivalents of  $\text{NaAsF}_6$ , over 14 days ( $\text{D}_2\text{O}$ , 376 MHz, 298K). Related to Figure 7.

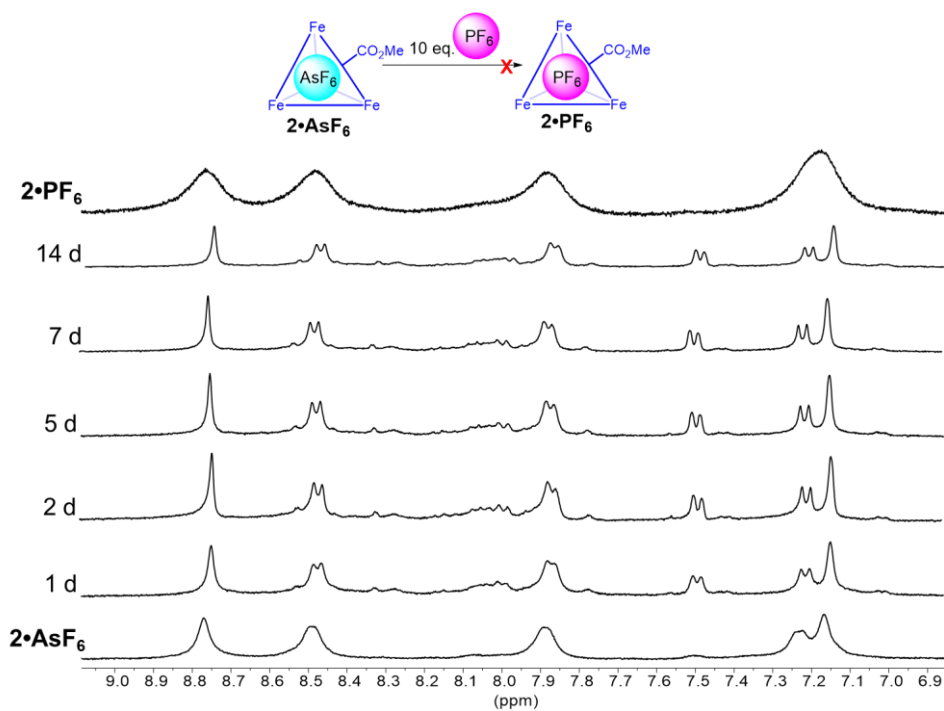

**Figure S-60.**  $^1\text{H}$  NMR spectra of  $2\bullet\text{AsF}_6$  with 10 equivalents of  $\text{NaPF}_6$ , over 14 days ( $\text{D}_2\text{O}$ , 400 MHz, 298K). Related to Figure 7.

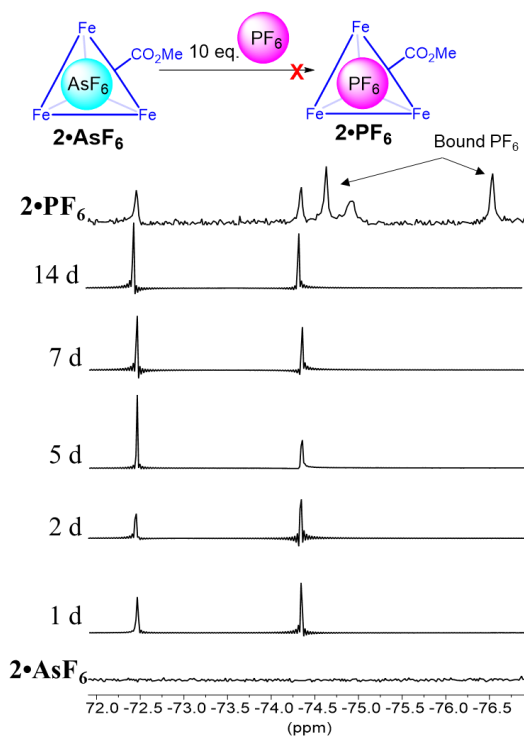

**Figure S-61.**  $^{19}\text{F}$  NMR spectra of  $2\bullet\text{AsF}_6$  with 10 equivalents of  $\text{NaPF}_6$ , over 14 days ( $\text{D}_2\text{O}$ , 376 MHz, 298K). Related to Figure 7.

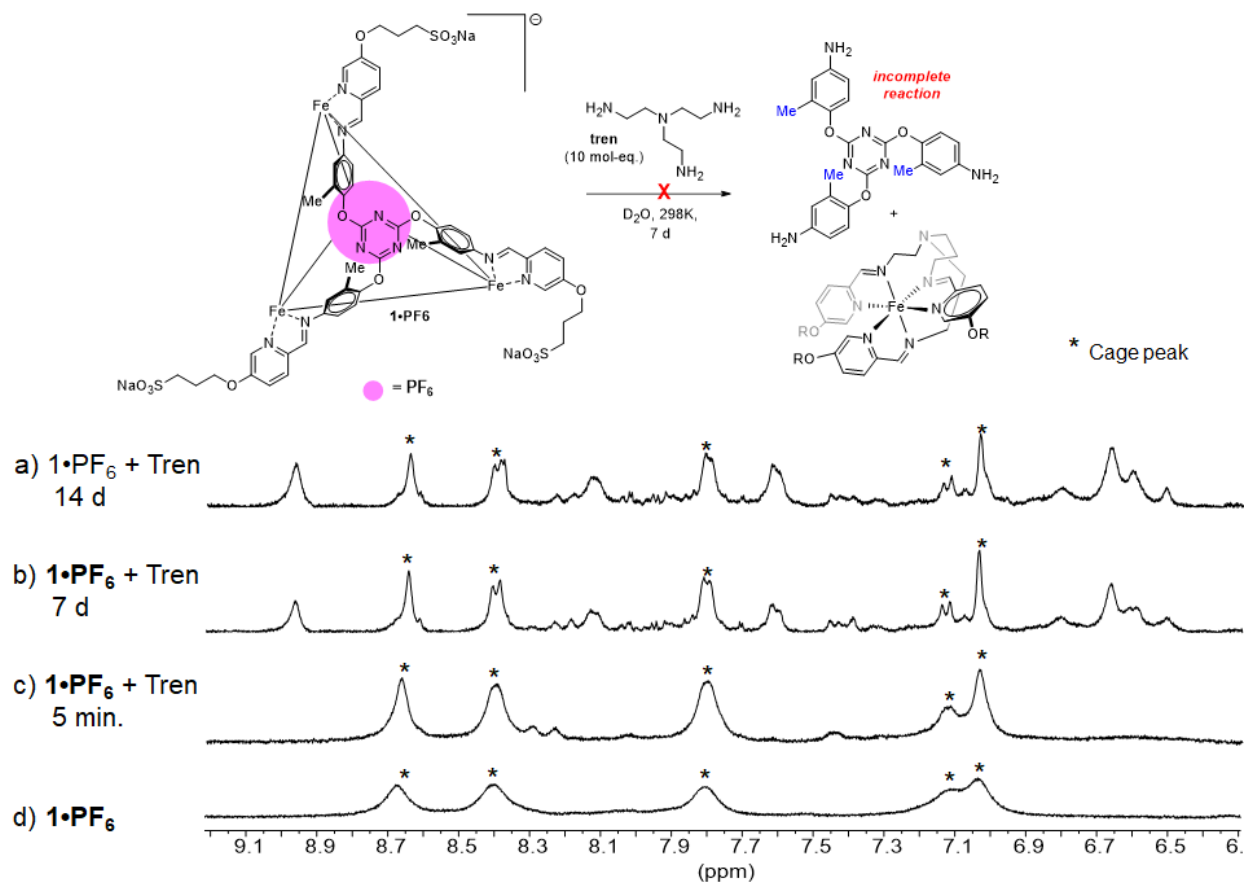

**Figure S-62.**  $^1\text{H}$  NMR spectrum of d)  $1 \cdot \text{PF}_6$ ; and  $1 \cdot \text{PF}_6$  with tris(2-aminoethyl)amine after c) 5 minutes; b) 1 week; and a) 2 weeks ( $\text{D}_2\text{O}$ , 400 MHz, 298K). Related to Figure 6.

## Synthesis: Alternate Methods of Cage Assembly

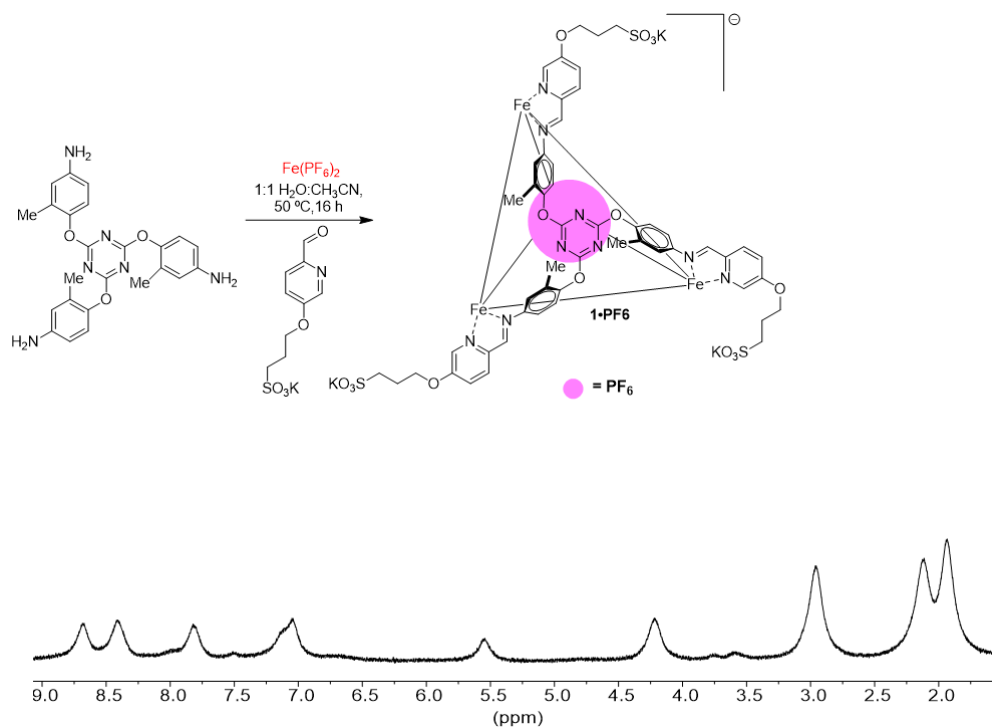

**Figure S-63.** <sup>1</sup>H NMR spectrum of cage **1**•PF<sub>6</sub>, made with Fe(PF<sub>6</sub>)<sub>2</sub> (D<sub>2</sub>O, 400 MHz, 298K). Related to Figure 1.

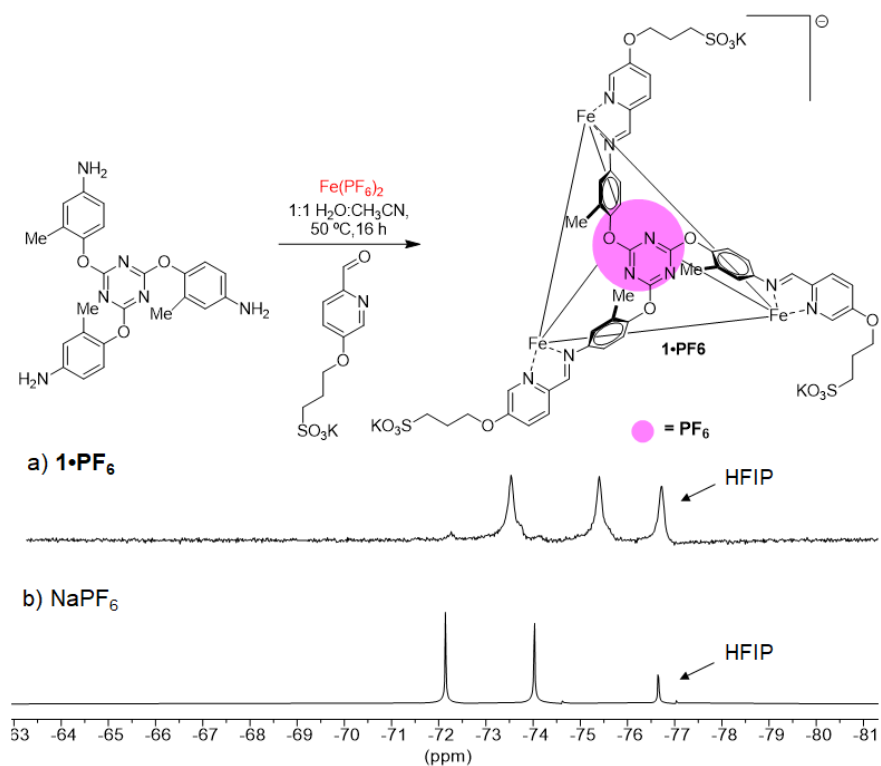

**Figure S-64.** <sup>19</sup>F NMR spectrum of a) **1**•PF<sub>6</sub> made with Fe(PF<sub>6</sub>)<sub>2</sub> and b) NaPF<sub>6</sub> with hexafluoroisopropanol (HFIP) as a standard (D<sub>2</sub>O, 376 MHz, 298K). Related to Figure 1.

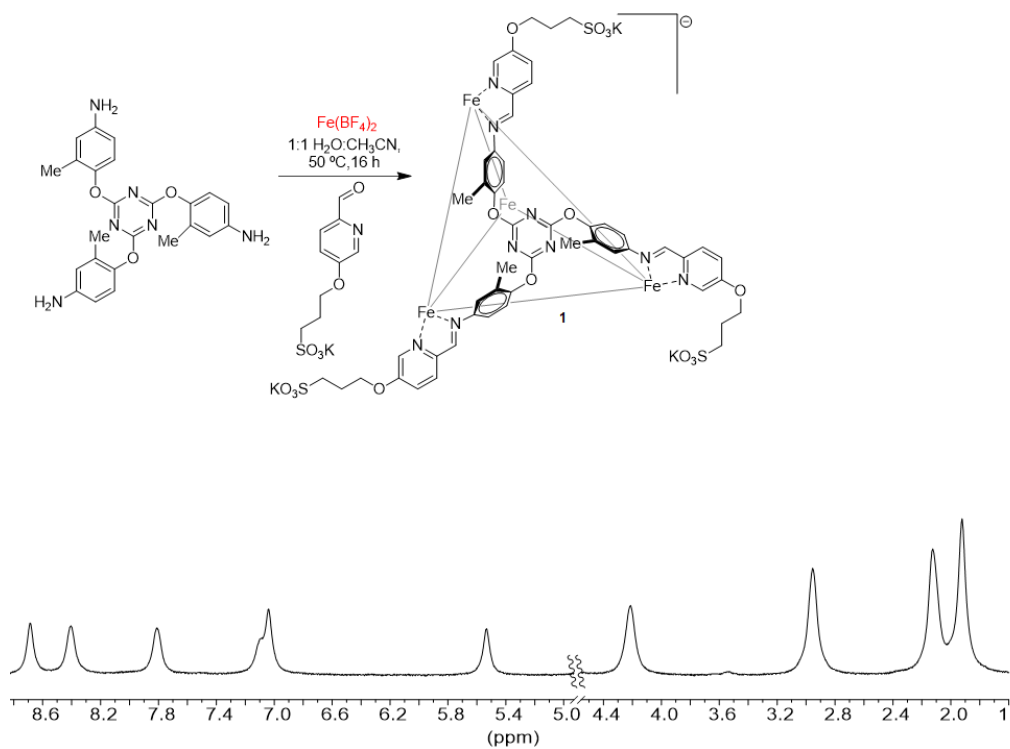

**Figure S-65.**  $^1\text{H}$  NMR spectrum of cage **1**, made with  $\text{Fe}(\text{BF}_4)_2$  ( $\text{D}_2\text{O}$ , 400 MHz, 298K). Related to Figure 1.

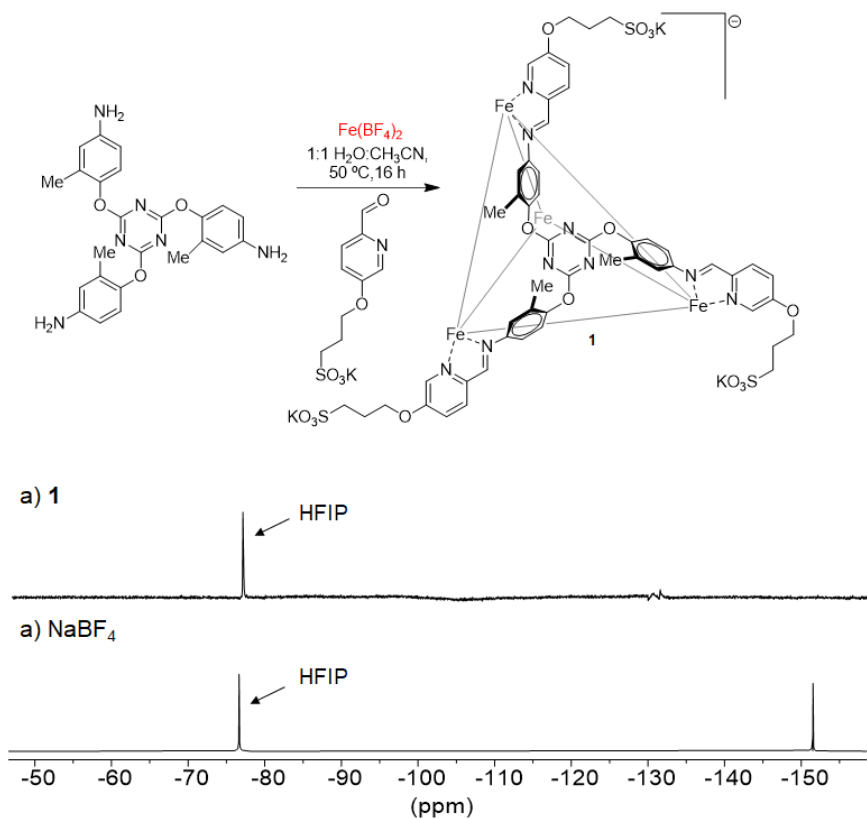

**Figure S-66.**  $^{19}\text{F}$  NMR spectrum of a) **1** made with  $\text{Fe}(\text{BF}_4)_2$  and b)  $\text{NaBF}_4$  with hexafluoroisopropanol (HFIP) as a standard ( $\text{D}_2\text{O}$ , 376 MHz, 298K). Related to Figure 1.

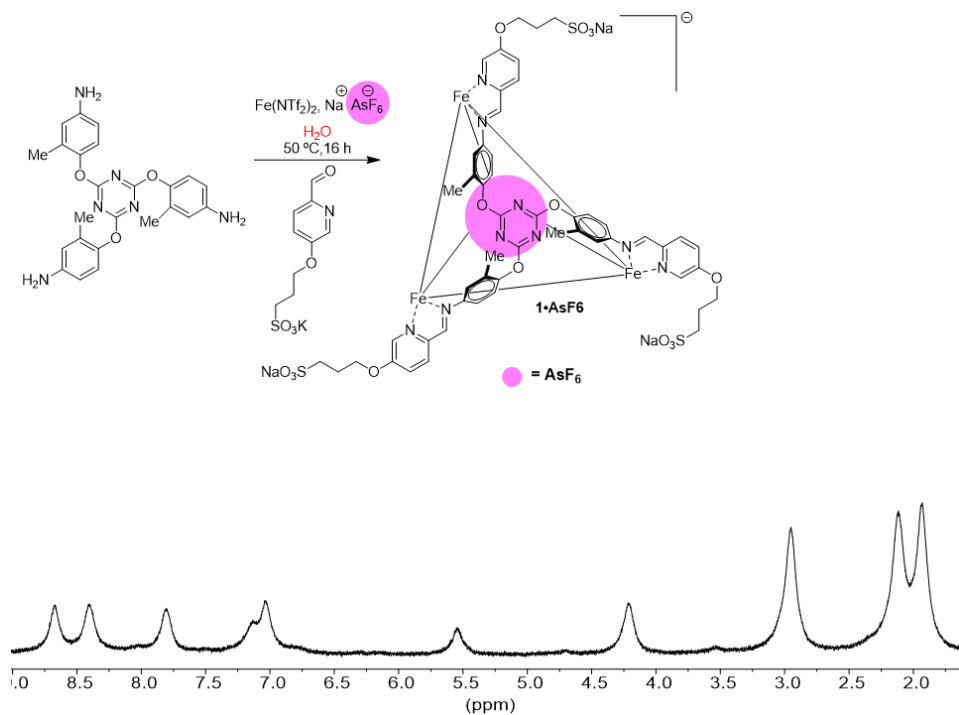

**Figure S-67.**  $^1\text{H}$  NMR spectrum of cage  $1 \cdot \text{AsF}_6$ , made from pure water ( $\text{D}_2\text{O}$ , 400 MHz, 298K). Related to Figure 1.

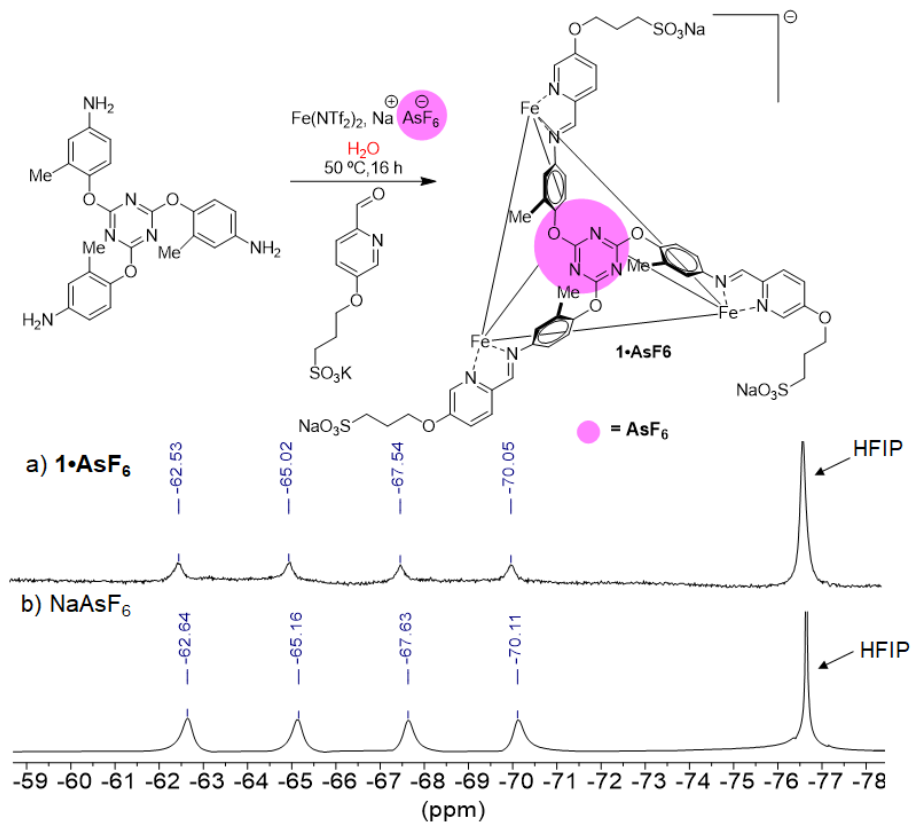

**Figure S-68.**  $^{19}\text{F}$  NMR spectrum of a)  $1 \cdot \text{AsF}_6$ , made from pure water and b)  $\text{NaAsF}_6$  with hexafluoroisopropanol (HFIP) as a standard ( $\text{D}_2\text{O}$ , 376 MHz, 298K). Related to Figure 1.

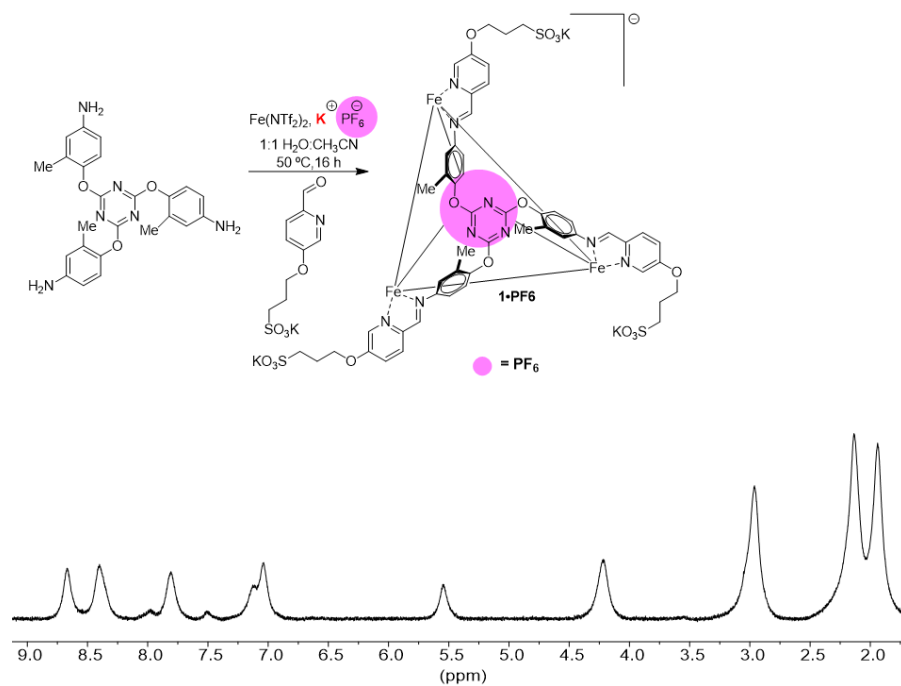

**Figure S-69.**  $^1\text{H}$  NMR spectrum of cage  $1\cdot\text{PF}_6$ , made with  $\text{Fe}(\text{NTf}_2)_2$  and 10 equivalents of  $\text{KPF}_6$  ( $\text{D}_2\text{O}$ , 400 MHz, 298K). Related to Figure 1.

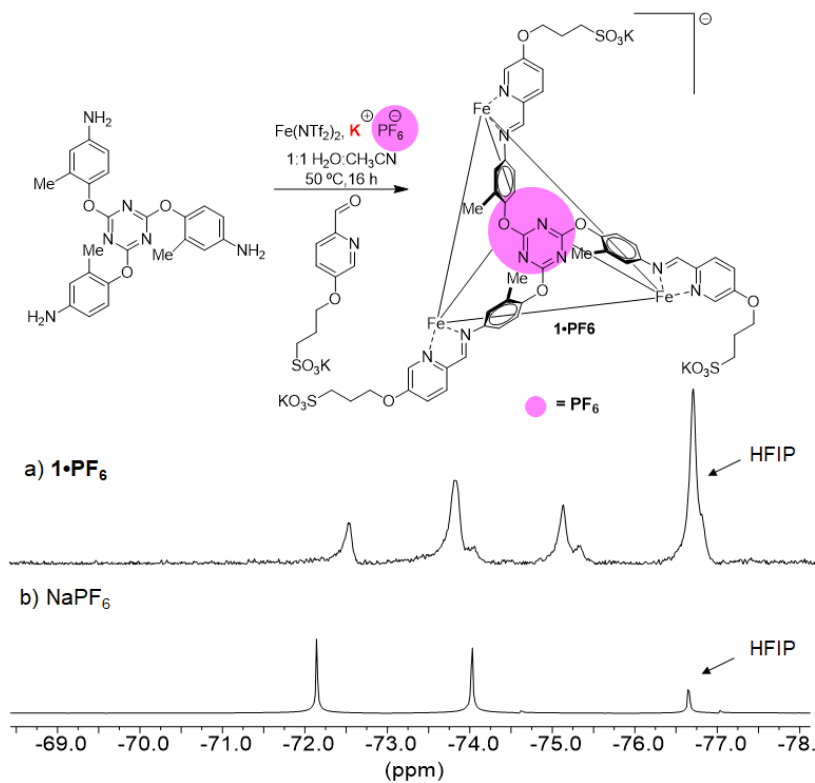

**Figure S-70.**  $^{19}\text{F}$  NMR spectrum of a)  $1\cdot\text{PF}_6$ , made from  $\text{Fe}(\text{NTf}_2)_2$  and  $\text{KPF}_6$  and b)  $\text{NaPF}_6$  with hexafluoroisopropanol (HFIP) as a standard ( $\text{D}_2\text{O}$ , 376 MHz, 298K). Related to Figure 1.



Characterization:  $^{19}\text{F}$  NMR Spectra of Guests and Cages including HFIP Standards

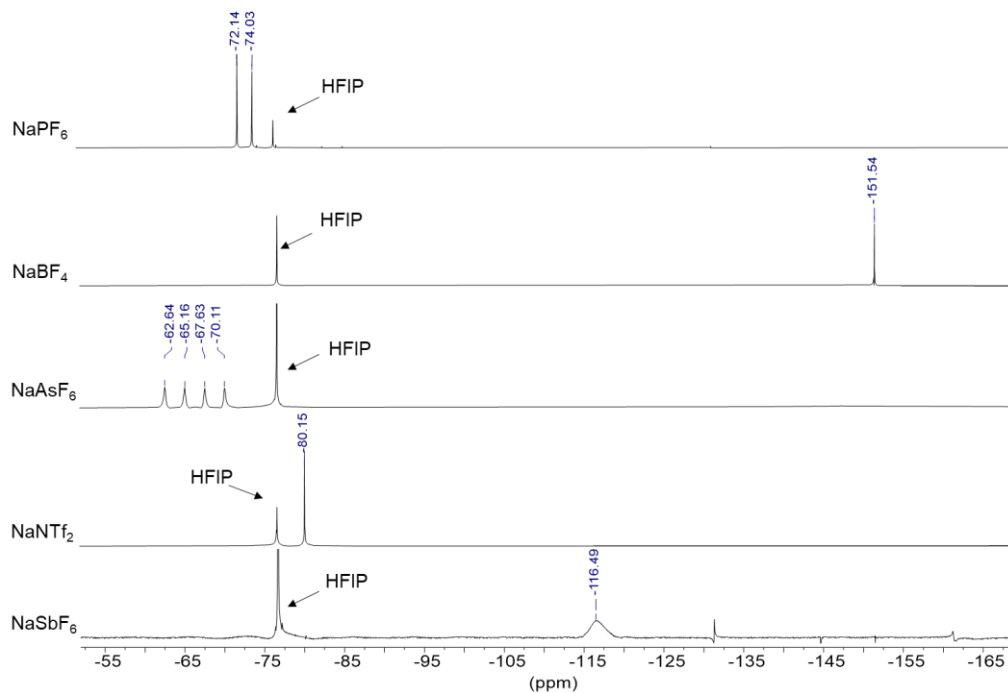

Figure S-71.  $^{19}\text{F}$  NMR spectra of anionic guests with hexafluoroisopropanol (HFIP) as a standard ( $\text{D}_2\text{O}$ , 376 MHz, 298K). Related to Figure 3.

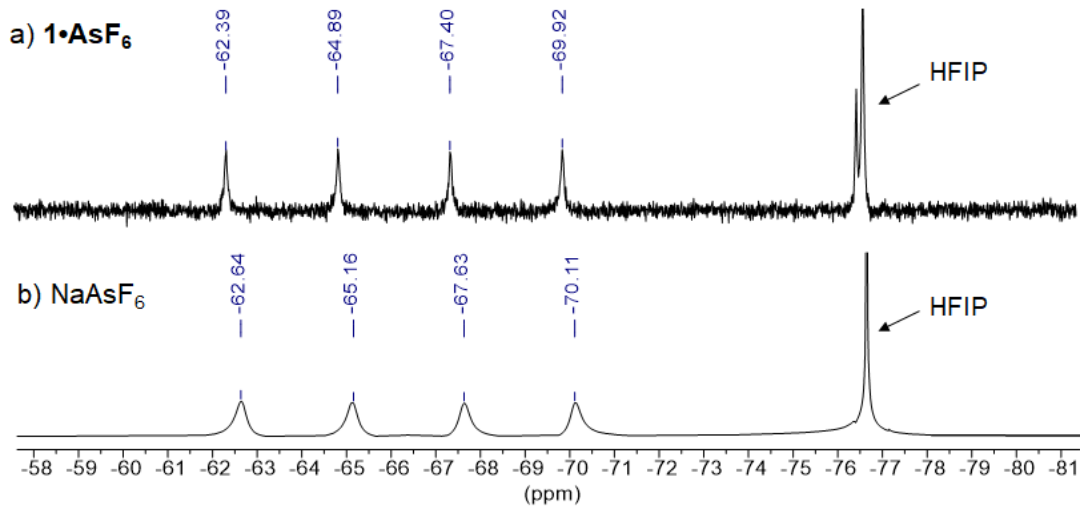

Figure S-72.  $^{19}\text{F}$  NMR spectrum of a)  $1\text{-AsF}_6$  and b)  $\text{NaAsF}_6$  with hexafluoroisopropanol (HFIP) as a standard ( $\text{D}_2\text{O}$ , 376 MHz, 298K). Related to Figure 3.

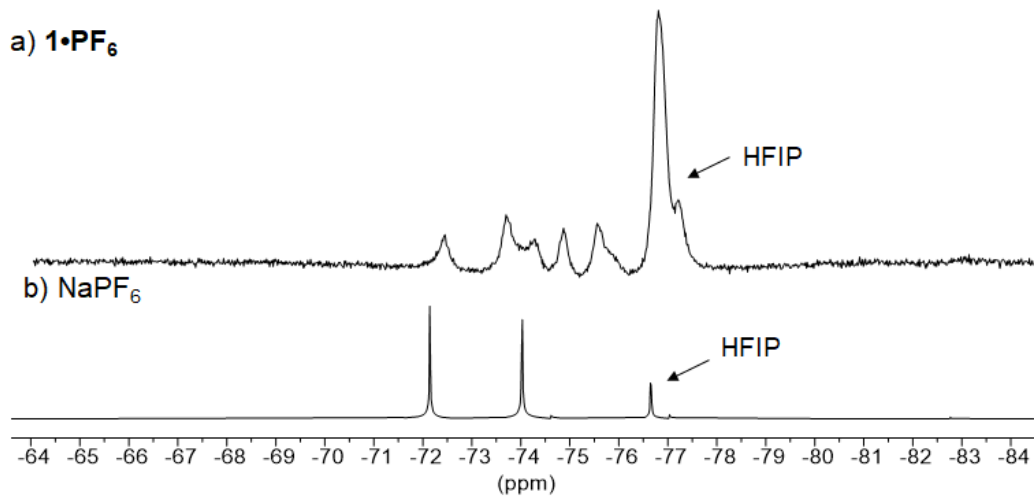

**Figure S-73.**  $^{19}\text{F}$  NMR spectrum of a)  $1\cdot\text{PF}_6$  and b)  $\text{NaPF}_6$  with hexafluoroisopropanol (HFIP) as a standard ( $\text{D}_2\text{O}$ , 376 MHz, 298K). Related to Figure 3.

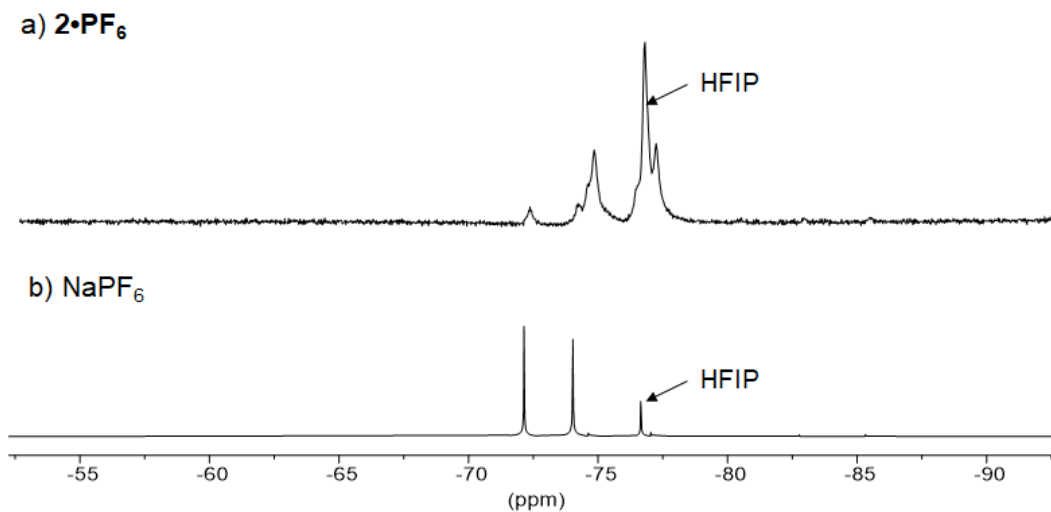

**Figure S-74.**  $^{19}\text{F}$  NMR spectrum of a)  $2\cdot\text{PF}_6$  and b)  $\text{NaPF}_6$  with hexafluoroisopropanol (HFIP) as a standard ( $\text{D}_2\text{O}$ , 376 MHz, 298K). Related to Figure 3.
